# Supplementary material
Source: PubMed Central journal article supplement (PMC3180200)
Supplement: ja203157u_si_001.pdf [file ja203157u_si_001.pdf]

*Supporting Information for:*

# Does Compound I vary significantly between isoforms of Cytochrome P450?

*Richard Lonsdale, Julianna Oláh<sup>1</sup>, Adrian J. Mulholland\* and Jeremy N. Harvey\**

Centre for Computational Chemistry, School of Chemistry, University of Bristol,

Cantock's Close, Bristol, BS8 1TS, UK.

Corresponding authors: [Jeremy.Harvey@bris.ac.uk](mailto:Jeremy.Harvey@bris.ac.uk); [Adrian.Mulholland@bris.ac.uk](mailto:Adrian.Mulholland@bris.ac.uk)

<sup>1</sup>Present address: Materials Structure and Modeling Research Group of the Hungarian Academy of Sciences, Budapest University of Technology and Economics, P.O. Box 91, 1521 Budapest, Hungary

## Contents

- Part A -** Details of molecular dynamics (MD) simulations
- Part B -** Absolute energies of all computed species
- Part C -** Mulliken spin densities for QM/MM optimized snapshots of Compound I
- Part D -** Mulliken charges for QM/MM optimized snapshots of Compound I
- Part E -** Key bond lengths and hydrogen bond distances

### Full reference for ref. 48:

MacKerell, A. D.; Bashford, D.; Bellott, M.; Dunbrack, R. L.; Evanseck, J. D.; Field, M. J.; Fischer, S.; Gao, J.; Guo, H.; Ha, S.; Joseph-McCarthy, D.; Kuchnir, L.; Kuczera, K.; Lau, F. T. K.; Mattos, C.; Michnick, S.; Ngo, T.; Nguyen, D. T.; Prodhom, B.; Reiher, W. E.; Roux, B.; Schlenkrich, M.; Smith, J. C.; Stote, R.; Straub, J.; Watanabe, M.; Wiorkiewicz-Kuczera, J.; Yin, D.; Karplus, M. *J. Phys. Chem. B* **1998**, *102*, 3586.

## Part A - Details of molecular dynamics simulations.

Hydrogen atoms were added to the crystal structures used, according to standard  $pK_a$  values, using the HBUILD module of the CHARMM program, version 30b2,<sup>1</sup> and their positions then optimized. The CHARMM27 force field was used throughout.<sup>2</sup> Previous calculations on P450<sub>cam</sub> have revealed the necessity to protonate the residue Asp297 at the OD2 oxygen.<sup>3</sup> This proton forms a hydrogen bond with the O2A atom of a haem propionate, the absence of which results in structures that are inconsistent with experiment after MD simulation. Hence in this work, models of P450<sub>cam</sub> were used in which the O2D oxygen of Asp297 was protonated. Histidine tautomers were assigned based on their local hydrogen-bonding environment. Each system was then truncated to a sphere of 25 Å centred on the haem iron. Charged residues (Arg, Asp, Lys, Glu) located 20 Å or further from the centre of each system were neutralized for MD simulation in order to avoid any unrealistic effects due to protein truncation and insufficient screening of charges by the solvent.

Unlike propene, no topology or force field parameters exist for warfarin and dextromethorphan in the standard CHARMM force field. The same parameters for dextromethorphan were used here as in previous work, and are shown below.<sup>4</sup> Charges were based on electrostatic potential (ESP) charges obtained from gas-phase QM calculations of warfarin at the B3LYP/LACVP\*\* level of theory. Angle and bond parameters were derived from these QM calculations together with chemically similar bonds and angles available in the CHARMM force field. The topology and parameters for warfarin and dextromethorphan are detailed below. Modified haem parameters were used to model Compound I, as used in previous work, these are shown below.<sup>5</sup>

The systems were each solvated in a 25 Å sphere of pre-equilibrated water molecules, represented by the TIP3P model.<sup>6</sup> All overlapping water molecules, i.e. those whose oxygen atom was 2.6 Å or closer to existing heavy atoms were deleted. The positions of the added water molecules were then optimized using 1000 steps of steepest descent (SD) followed by 500 steps of conjugate gradient (CG) minimization. A 13 Å cut-off for non-bonded interactions was used in all molecular mechanics energy minimizations and MD simulations. Further minimizations were carried out on both the added and crystallographic water molecules using 600 steps of SD and 1500 steps using the Adopted Basis Newton-Raphson (ABNR) algorithm. The water was

then heated from 0 to 300 K over 1 ps and then equilibrated for 25 ps in stochastic boundary molecular dynamics (SBMD) simulations where water molecules within 20 Å of the haem iron were treated with full Newtonian dynamics and the remainder treated with Langevin dynamics. The water atoms were kept within 25 Å of the haem iron by the application of a deformable boundary potential. Each whole system was then minimized and equilibrated for 100 ps using SBMD. Friction coefficients used in the Langevin dynamics were 62 ps<sup>-1</sup> for water oxygen atoms and 250 ps<sup>-1</sup> for protein heavy atoms. Protein atoms more than 20 Å from the haem iron were harmonically restrained to their initial positions with force constants increasing with distance from the centre of the system. The energy of each system was then minimized with 500 steps of SD and 1750 steps of ABNR. These optimized geometries were then used as starting points for 5 ns SBMD simulations following the same protocol as above. A time step of 1 fs was used, which was chosen to be small compared to the highest frequency motion, the C–H bond, which occurs on the 10 fs timescale. The SHAKE algorithm was used to constrain the bonds to hydrogen atoms and reduce the computational expense.<sup>7</sup>

### **Modified heme MM parameters for Compound I:**

The heme group parameters contained in the CHARMM27 force field do not contain any axial ligands to the iron center. These parameters were modified to include an oxygen atom and a thiolate ligand, to represent the Compound I species in cytochrome P450. The atomic charges on the  $\alpha$ -,  $\beta$ - and *meso*-carbons, as well as on the pyrrole nitrogens were adjusted to account for the different charge distribution in Compound I, as detailed previously (Bathelt et al., *J. Am. Chem. Soc.*, **2005**, *127*, 12900).

Additional bond and angle parameters were derived from the QM optimized Compound I model and from analogy to chemically similar bond lengths and angles available in the CHARMM27 force field.

atom name type charge

GROUP

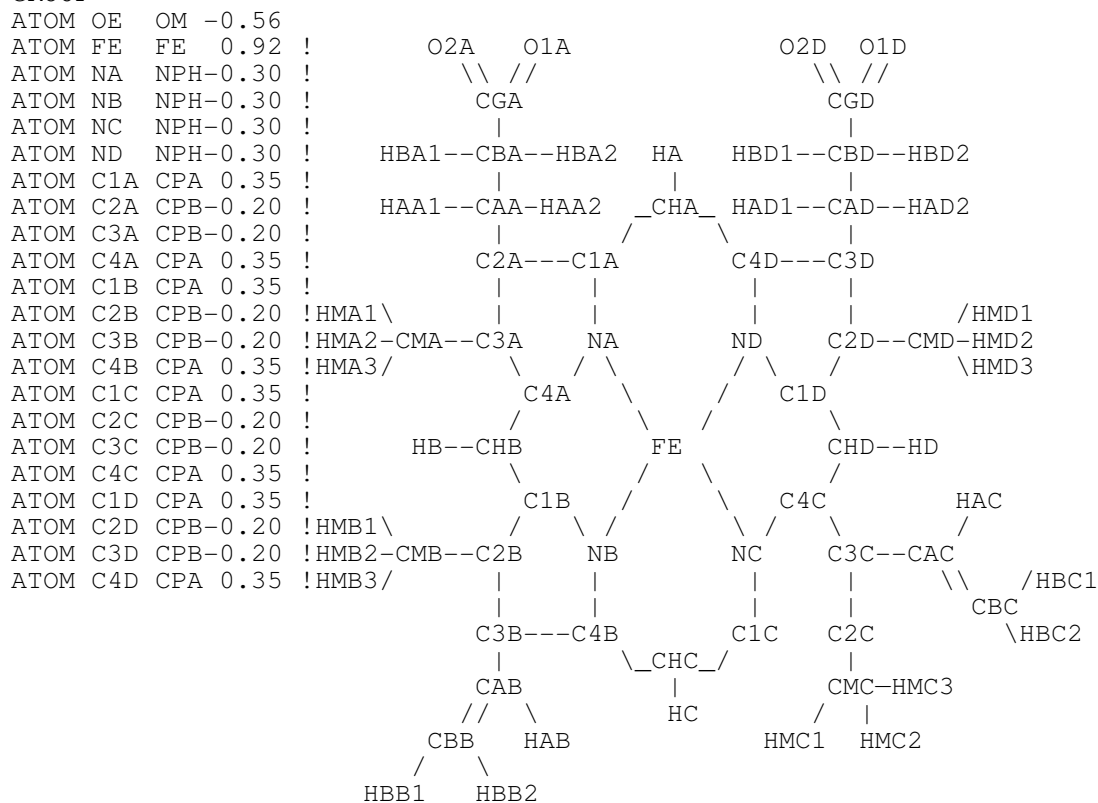

```

ATOM CB CT2-0.10 !
ATOM HB1 HA 0.09 !
ATOM HB2 HA 0.09 !
ATOM SG S -0.44 !

```

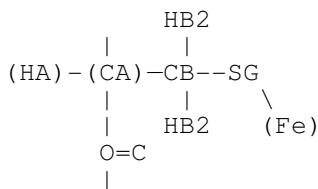

```

bonds:   kB   b0
OM FE 350.000 1.6300

```

b<sub>0</sub> from QM calculation;  
k<sub>B</sub> increased from value in the original CHARMM set to account for higher bond order of oxygen in Compound I

```

angles:  k\  \0
FE S CT2 38.8 113.0
OM FE NPH 50.0 90.0

```

\0 from QM calculation;  
k\ from HS S CT2 parameters  
\0 from original CHARMM parameter set  
k\ increased to account for tighter binding of oxygen in Compound I compared to O2 ligand  
from original OM-FE-NPH CHARMM parameters

```

S FE NPH 5.000 90.0000

```

## MM parameters for warfarin:

RESI WARF 0.000

GROUP

ATOM C1 C 0.603 !  
 ATOM C2 CA -0.382 !  
 ATOM C3 CA 0.001 !  
 ATOM C4 CA -0.228 !  
 ATOM C5 CA -0.021 !  
 ATOM C6 CA -0.337 !  
 ATOM C8 C 0.597 !  
 ATOM C10 CA -0.636 !  
 ATOM C12 C 0.911 !  
 ATOM O1 OS -0.573 !  
 ATOM O2 OH1 -0.666 !  
 ATOM O3 O -0.559 !  
 ATOM C14 CT1 0.350 !  
 ATOM C16 CT2 -0.390 !  
 ATOM C18 C 0.658 !  
 ATOM C7 CT3 -0.427 !  
 ATOM O4 O -0.540 !  
 ATOM C9 CA -0.146 !  
 ATOM C11 CA -0.144 !  
 ATOM C13 CA -0.225 !  
 ATOM C15 CA 0.083 !  
 ATOM C17 CA -0.144 !  
 ATOM C19 CA -0.117 !  
 ATOM H1 HP 0.083 !  
 ATOM H2 HP 0.153 !  
 ATOM H3 HP 0.130 !  
 ATOM H4 HP 0.190 !  
 ATOM H8 H 0.489 !  
 ATOM H10 HA 0.123  
 ATOM H12 HA 0.123  
 ATOM H14 HA 0.123  
 ATOM H5 HB 0.110  
 ATOM H6 HB 0.110  
 ATOM H7 HB 0.090  
 ATOM H9 HP 0.117  
 ATOM H11 HP 0.110  
 ATOM H13 HP 0.150  
 ATOM H15 HP 0.115  
 ATOM H16 HP 0.116

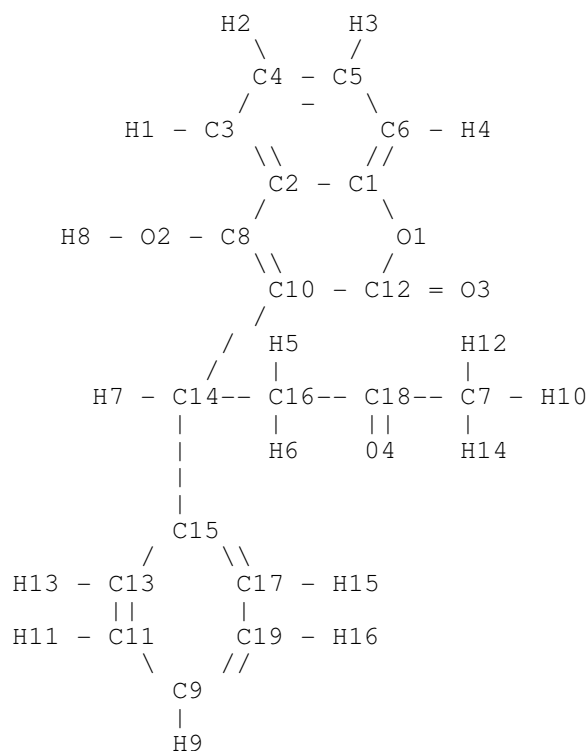

BOND C1 C2  
 BOND C1 C6  
 BOND C1 O1  
 BOND C2 C3  
 BOND C2 C8  
 BOND C3 C4  
 BOND C3 H1  
 BOND C4 C5  
 BOND C4 H2  
 BOND C5 C6  
 BOND C5 H3  
 BOND C6 H4  
 BOND C8 C10  
 BOND C8 O2  
 BOND C10 C12  
 BOND C10 C14  
 BOND C12 O1  
 BOND C12 O3  
 BOND O2 H8  
 BOND C14 C16  
 BOND C14 H7  
 BOND C14 C15  
 BOND C16 C18  
 BOND C16 H5  
 BOND C16 H6

BOND C18 C7  
 BOND C18 O4  
 BOND C7 H10  
 BOND C7 H12  
 BOND C7 H14  
 BOND C9 C11  
 BOND C9 C19  
 BOND C9 H9  
 BOND C11 C13  
 BOND C11 H11  
 BOND C13 C15  
 BOND C13 H13  
 BOND C15 C17  
 BOND C17 C19  
 BOND C17 H15  
 BOND C19 H16  
 IMPH C6 C1 C2 C3  
 IMPH C2 C1 C6 C5  
 IMPH C1 C2 C3 C4  
 IMPH C2 C3 C4 C5  
 IMPH C3 C4 C5 C6  
 IMPH C4 C5 C6 C1  
 IMPH C19 C9 C11 C13  
 IMPH C11 C9 C19 C17  
 IMPH C9 C11 C13 C15  
 IMPH C11 C13 C15 C17  
 IMPH C13 C15 C17 C19  
 IMPH C15 C17 C19 C9  
 IMPH C1 C2 C6 O1  
 IMPH C2 C1 C3 C8  
 IMPH C3 C2 C4 H1  
 IMPH C4 C3 C5 H2  
 IMPH C5 C4 C6 H3  
 IMPH C6 C1 C5 H4  
 IMPH C8 C2 O2 C10  
 IMPH C10 C12 C14 C8  
 IMPH C12 C10 O1 O3  
 IMPH C18 C7 O4 C16  
 IMPH C9 C11 C19 H9  
 IMPH C11 C9 C13 H11  
 IMPH C13 C11 C15 H13  
 IMPH C15 C13 C17 C14  
 IMPH C17 C15 C19 H15  
 IMPH C19 C9 C17 H16  
 IC C6 C1 C2 C3 1.40 121.85 -0.36 117.92 1.41  
 IC O1 C1 C2 C3 1.38 120.83 179.34 117.92 1.41  
 IC C6 C1 C2 C8 1.40 121.85 179.37 117.13 1.45  
 IC C2 C6 \*C1 O1 1.41 121.85 -179.71 117.32 1.38  
 IC C1 C3 \*C2 C8 1.41 117.92 -179.70 124.95 1.45  
 IC C1 C2 C3 C4 1.41 117.92 0.37 120.72 1.39  
 IC C8 C2 C3 C4 1.45 124.95 -179.34 120.72 1.39  
 IC C1 C2 C3 H1 1.41 117.92 -179.23 120.94 1.09  
 IC C2 C4 \*C3 H1 1.41 120.72 179.61 118.34 1.09  
 IC C2 C3 C4 C5 1.41 120.72 -0.12 120.11 1.41  
 IC H1 C3 C4 C5 1.09 118.34 179.49 120.11 1.41  
 IC C2 C3 C4 H2 1.41 120.72 -179.96 119.86 1.08  
 IC C3 C5 \*C4 H2 1.39 120.11 179.84 120.03 1.08  
 IC C3 C4 C5 C6 1.39 120.11 -0.15 120.29 1.39  
 IC H2 C4 C5 C6 1.08 120.03 179.69 120.29 1.39  
 IC C3 C4 C5 H3 1.39 120.11 -179.97 119.94 1.08  
 IC C4 C6 \*C5 H3 1.41 120.29 179.82 119.77 1.08  
 IC C4 C5 C6 C1 1.41 120.29 0.16 119.11 1.40  
 IC H3 C5 C6 C1 1.08 119.77 179.98 119.11 1.40  
 IC C4 C5 C6 H4 1.41 120.29 -179.70 122.19 1.08  
 IC C1 C5 \*C6 H4 1.40 119.11 -179.86 122.19 1.08  
 IC C5 C6 C1 C2 1.39 119.11 0.10 121.85 1.41  
 IC H4 C6 C1 C2 1.08 118.70 179.97 121.85 1.41  
 IC C5 C6 C1 O1 1.39 119.11 -179.61 117.32 1.38  
 IC C1 C2 C8 C10 1.41 117.13 0.65 122.76 1.37

|                     |      |        |         |        |      |
|---------------------|------|--------|---------|--------|------|
| IC C3 C2 C8 C10     | 1.41 | 124.95 | -179.64 | 122.76 | 1.37 |
| IC C1 C2 C8 O2      | 1.41 | 117.13 | -179.41 | 119.99 | 1.38 |
| IC C2 C10 *C8 O2    | 1.45 | 122.76 | -179.94 | 117.25 | 1.38 |
| IC C2 C8 C10 C12    | 1.45 | 122.76 | 1.45    | 119.43 | 1.45 |
| IC O2 C8 C10 C12    | 1.38 | 117.25 | -178.50 | 119.43 | 1.45 |
| IC C2 C8 C10 C14    | 1.45 | 122.76 | 179.42  | 120.29 | 1.53 |
| IC C8 C12 *C10 C14  | 1.37 | 119.43 | -177.98 | 120.25 | 1.53 |
| IC C8 C10 C12 O1    | 1.37 | 119.43 | -3.18   | 117.15 | 1.43 |
| IC C14 C10 C12 O1   | 1.53 | 120.25 | 178.85  | 117.15 | 1.43 |
| IC C8 C10 C12 O3    | 1.37 | 119.43 | 177.26  | 127.29 | 1.23 |
| IC C10 O1 *C12 O3   | 1.45 | 117.15 | 179.62  | 115.56 | 1.23 |
| IC C10 C12 O1 C1    | 1.45 | 117.15 | 2.99    | 122.62 | 1.38 |
| IC O3 C12 O1 C1     | 1.23 | 115.56 | -177.39 | 122.62 | 1.38 |
| IC C12 O1 C1 C2     | 1.43 | 122.62 | -0.94   | 120.83 | 1.41 |
| IC C12 O1 C1 C6     | 1.43 | 122.62 | 178.78  | 117.32 | 1.40 |
| IC C8 C10 C14 C16   | 1.37 | 120.29 | 138.16  | 113.48 | 1.55 |
| IC C12 C10 C14 C16  | 1.45 | 120.25 | -43.88  | 113.48 | 1.55 |
| IC C8 C10 C14 H7    | 1.37 | 120.29 | 22.25   | 106.13 | 1.09 |
| IC C8 C10 C14 C15   | 1.37 | 120.29 | -93.41  | 111.87 | 1.54 |
| IC C10 C14 C16 C18  | 1.53 | 113.48 | -157.22 | 112.40 | 1.52 |
| IC H7 C14 C16 C18   | 1.09 | 105.92 | -41.18  | 112.40 | 1.52 |
| IC C15 C14 C16 C18  | 1.54 | 112.37 | 74.61   | 112.40 | 1.52 |
| IC C10 C14 C16 H5   | 1.53 | 113.48 | 78.28   | 111.70 | 1.09 |
| IC C10 C14 C16 H6   | 1.53 | 113.48 | -38.34  | 109.85 | 1.10 |
| IC C14 C16 C18 C7   | 1.55 | 112.40 | -160.12 | 116.56 | 1.51 |
| IC H5 C16 C18 C7    | 1.09 | 110.23 | -34.81  | 116.56 | 1.51 |
| IC H6 C16 C18 C7    | 1.10 | 106.89 | 79.28   | 116.56 | 1.51 |
| IC C14 C16 C18 O4   | 1.55 | 112.40 | 20.35   | 122.10 | 1.24 |
| IC C16 C7 *C18 O4   | 1.52 | 116.56 | 179.53  | 121.34 | 1.24 |
| IC C16 C18 C7 H10   | 1.52 | 116.56 | -167.49 | 110.12 | 1.09 |
| IC O4 C18 C7 H10    | 1.24 | 121.34 | 12.04   | 110.12 | 1.09 |
| IC C16 C18 C7 H12   | 1.52 | 116.56 | -45.31  | 111.25 | 1.10 |
| IC C16 C18 C7 H14   | 1.52 | 116.56 | 72.84   | 109.41 | 1.10 |
| IC C10 C14 C15 C13  | 1.53 | 111.87 | 114.37  | 119.46 | 1.40 |
| IC C16 C14 C15 C13  | 1.55 | 112.37 | -116.61 | 119.46 | 1.40 |
| IC H7 C14 C15 C13   | 1.09 | 106.41 | -1.12   | 119.46 | 1.40 |
| IC C10 C14 C15 C17  | 1.53 | 111.87 | -65.43  | 121.83 | 1.41 |
| IC C14 C13 *C15 C17 | 1.54 | 119.46 | 179.81  | 118.70 | 1.41 |
| IC C14 C15 C13 C11  | 1.54 | 119.46 | -179.71 | 120.79 | 1.40 |
| IC C17 C15 C13 C11  | 1.41 | 118.70 | 0.10    | 120.79 | 1.40 |
| IC C14 C15 C13 H13  | 1.54 | 119.46 | 0.91    | 119.11 | 1.09 |
| IC C11 C15 *C13 H13 | 1.40 | 120.79 | -179.38 | 119.11 | 1.09 |
| IC C15 C13 C11 C9   | 1.40 | 120.79 | 0.05    | 120.16 | 1.40 |
| IC H13 C13 C11 C9   | 1.09 | 120.10 | 179.43  | 120.16 | 1.40 |
| IC C15 C13 C11 H11  | 1.40 | 120.79 | -179.85 | 119.69 | 1.09 |
| IC C9 C13 *C11 H11  | 1.40 | 120.16 | -179.90 | 119.69 | 1.09 |
| IC C13 C11 C9 C19   | 1.40 | 120.16 | -0.13   | 119.50 | 1.40 |
| IC H11 C11 C9 C19   | 1.09 | 120.16 | 179.77  | 119.50 | 1.40 |
| IC C13 C11 C9 H9    | 1.40 | 120.16 | 179.90  | 120.26 | 1.09 |
| IC C11 C19 *C9 H9   | 1.40 | 119.50 | 179.97  | 120.24 | 1.09 |
| IC C11 C9 C19 C17   | 1.40 | 119.50 | 0.05    | 120.39 | 1.40 |
| IC H9 C9 C19 C17    | 1.09 | 120.24 | -179.97 | 120.39 | 1.40 |
| IC C11 C9 C19 H16   | 1.40 | 119.50 | -179.96 | 119.97 | 1.09 |
| IC C9 C17 *C19 H16  | 1.40 | 120.39 | -179.99 | 119.64 | 1.09 |
| IC C9 C19 C17 C15   | 1.40 | 120.39 | 0.10    | 120.47 | 1.41 |
| IC H16 C19 C17 C15  | 1.09 | 119.64 | -179.89 | 120.47 | 1.41 |
| IC C9 C19 C17 H15   | 1.40 | 120.39 | 179.67  | 119.77 | 1.09 |
| IC C15 C19 *C17 H15 | 1.41 | 120.47 | 179.57  | 119.77 | 1.09 |
| IC C19 C17 C15 C14  | 1.40 | 120.47 | 179.63  | 121.83 | 1.54 |
| IC H15 C17 C15 C14  | 1.09 | 119.76 | 0.06    | 121.83 | 1.54 |
| IC C19 C17 C15 C13  | 1.40 | 120.47 | -0.18   | 118.70 | 1.40 |
| IC C2 C8 O2 H8      | 1.45 | 119.99 | 3.06    | 113.37 | 0.97 |
| IC C10 C8 O2 H8     | 1.37 | 117.25 | -176.99 | 113.37 | 0.97 |

BONDS

!

!V(bond) = Kb(b - b0)\*\*2

!

!Kb: kcal/mole/A\*\*2



```

!b0: A
!
!atom type Kb          b0
C  CA      450.000     1.398 ! b0 from Jag. Kb from CPB C
C  OS      340.000     1.381 ! b0 from Jag. Kb from OS CT3
C  OH1     340.000     1.380 ! b0 from Jag. Kb from OS CT3
CA OS      340.000     1.381 ! b0 from Jag. Kb from OS CT3
CA  O      340.000     1.235 ! b0 from Jag. Kb from OS CT3

ANGLES
!
!V(angle) = Ktheta(Theta - Theta0)**2
!
!Ktheta: kcal/mole/rad**2
!Theta0: degrees
!
!atom types          Ktheta      Theta0
CA  C  CA           40.0         122.3          ! ALL ANGLES FROM JAGUAR
CA  C  OS           55.0         118.4
C   CA  CA           40.0         122.2
C   CA  C            40.0         119.5
C   CA  HP           30.0         118.7
CA  C  OH1           55.0         118.5
C   CA  CT1          45.8         120.3
CA  C  O             80.0         127.3
OS  C  O             90.0         115.6
C   OS  C            40.0         122.6
C   OH1 H            55.0         113.3
CA  CT1 CA           45.8         111.9
CA  CT1 CT2          51.8         113.5
CA  CT1 HB           50.0         106.1
CT1 CT2 C            52.0         112.4
CT1 CT2 HB           50.0         110.8
CT2 C  CT3           40.0         116.6
CA  CA  OS           55.0         118.0
CA  OS  CA           40.0         122.3
OS  CA  C            55.0         116.8
OS  CA  O            50.0         116.6
C   CA  O            40.0         126.6
CA  C  CT1           45.8         122.3
CA  CA  O            40.0         114.5
C   CT1 CA           52.0         113.6
CA  O  C             40.0         118.2
O   C  OH1           50.0         105.4
OH1 C  CT3           55.0         112.0
CT2 C  OH1           55.0         106.9

DIHEDRALS
!
!V(dihedral) = Kchi(1 + cos(n(chi) - delta))
!
!Kchi: kcal/mole
!n: multiplicity
!delta: degrees
!
!atom types          Kchi      n      delta
C   CA  CA  HP       4.2      1      180.00  ! from HP CA CA CA
CA  C  CA  HP       4.2      1      180.00  ! from HP CA CA CA
CA  C  OH1 H         0.99     1      180.00  ! from H OH1 CA CA
OS  C  CA  HP       0.00     1         0.00  ! from O C CT1 HB
CT2 C  CT3 HA        0.04     3         0.00  ! from HA CT3 CT2 CA
CT3 C  CT2 HB        0.00     1         0.00  ! from HB CT2 C CT3
C   CA  CA  CA       3.10     2      180.00  ! from CA CA CA CA
C   CA  C  CA       3.10     2      180.00  ! from CA CA CA CA
C   CA  C  OH1       3.10     2      180.00  ! from CA CA CA OH1
C   OS  C  CA       3.10     2      180.00  ! from CA CA CA CA
C   OS  C  O         3.10     2      180.00  ! from CA CA CA OC
CA  C  CA  CA       3.10     2      180.00  ! from CA CA CA CA

```

|      |     |     |     |      |   |        |   |                    |
|------|-----|-----|-----|------|---|--------|---|--------------------|
| CA   | C   | CA  | CT1 | 3.10 | 2 | 180.00 | ! | from CA CA CA CA   |
| CA   | CA  | C   | OS  | 3.10 | 2 | 180.00 | ! | from CA CA CA OH1  |
| CA   | CA  | C   | OH1 | 3.10 | 2 | 180.00 | ! | from CA CA CA OH1  |
| C    | CA  | C   | OS  | 3.10 | 2 | 180.00 | ! | from CA CA CA OH1  |
| C    | CA  | C   | O   | 3.10 | 2 | 180.00 | ! | from CA CA CA OH1  |
| OS   | C   | CA  | CT1 | 3.10 | 2 | 180.00 | ! | from CA CA CA OH1  |
| OH1  | C   | CA  | CT1 | 3.10 | 2 | 180.00 | ! | from CA CA CA OH1  |
| O    | C   | CA  | CT1 | 3.10 | 2 | 180.00 | ! | from CA CA CA OH1  |
| CT1  | CT2 | C   | CT3 | 3.10 | 2 | 180.00 | ! | from CA CA CA CA   |
| CT1  | CT2 | C   | O   | 3.10 | 2 | 180.00 | ! | from CA CA CA OH1  |
| OS   | CA  | CA  | HP  | 4.20 | 2 | 180.00 | ! | from OC CA CA HP   |
| CA   | C   | CT1 | HB  | 0.04 | 3 | 0.00   | ! | from CA CT1 CT2 HA |
| O    | C   | OH1 | H   | 2.50 | 2 | 180.00 | ! | from O C NH1 H     |
| CT2  | C   | OH1 | H   | 1.30 | 1 | 0.00   | ! | from H OH1 CT2 CT2 |
| HB   | CT2 | C   | OH1 | 4.20 | 2 | 180.00 | ! | from OH1 CA CA HP  |
| OH1  | C   | CT3 | HA  | 4.20 | 2 | 180.00 | ! | from OH1 CA CA HP  |
| H    | OH1 | C   | CT3 | 1.33 | 1 | 0.00   | ! | from H OH1 CT1 CT3 |
| CA   | CA  | OS  | CA  | 3.10 | 2 | 180.00 | ! | from CA CA CA CA   |
| CA   | CA  | C   | CT1 | 0.20 | 1 | 0.00   | ! | from CT1 CT2 CPH1  |
| CPH1 |     |     |     |      |   |        |   |                    |
| CA   | CA  | O   | C   | 0.23 | 2 | 180.00 | ! | from CT3 CT2 CA CA |
| CA   | CA  | CA  | O   | 3.10 | 2 | 180.00 | ! | from CT2 CA CA CA  |
| CA   | OS  | CA  | C   | 2.05 | 2 | 180.00 | ! | from X CD OS X     |
| CA   | OS  | CA  | O   | 2.05 | 2 | 180.00 | ! | from X CD OS X     |
| OS   | CA  | CA  | CA  | 3.10 | 2 | 180.00 | ! | from CT2 CA CA CA  |
| OS   | CA  | C   | CA  | 3.10 | 2 | 180.00 | ! | from OC CA CA CA   |
| OS   | CA  | C   | CT1 | 0.40 | 1 | 180.00 | ! | from O C CP1 CP2   |
| CA   | C   | CA  | O   | 1.40 | 1 | 0.00   | ! | from O C CT1 CT2   |
| CA   | C   | CT1 | CT2 | 0.23 | 2 | 180.00 | ! | from CT1 CT2 CA CA |
| CA   | C   | CT1 | CA  | 0.23 | 2 | 180.00 | ! | from CT1 CT2 CA CA |
| CA   | O   | C   | CT2 | 3.10 | 2 | 180.00 | ! | from X CD OS X     |
| CA   | O   | C   | OH1 | 3.10 | 2 | 180.00 | ! | from X CD OS X     |
| CA   | O   | C   | CT3 | 3.10 | 2 | 180.00 | ! | from X CD OS X     |
| O    | CA  | C   | CT1 | 1.40 | 1 | 0.00   | ! | from O C CT1 CT2   |
| CT1  | CT2 | C   | OH1 | 1.40 | 1 | 0.00   | ! | from O C CT1 CT2   |
| C    | CA  | O   | C   | 3.10 | 2 | 180.00 | ! | from X CD OS X     |

IMPROPER

```

!
!V(improper) = Kpsi(psi - psi0)**2
!
!Kpsi: kcal/mole/rad**2
!psi0: degrees
!note that the second column of numbers (0) is ignored
!
!atom types          Kpsi          psi0
CA CA CA HP         20.000      0      0.000 ! from HA CPB C C (heme)
CA C CA HP         20.000      0      0.000 ! from HA CPB C C (heme)
CA C CA CA         96.000      0      0.000 ! from CC X X CT1
C CA CA CA         96.000      0      0.000 ! from CC X X CT1
CA CA CA CA         96.000      0      0.000 ! from CC X X CT1
C CA CA OS         96.000      0      0.000 ! from CC X X CT1
CA C CA C          96.000      0      0.000 ! from CC X X CT1
C CA OH1 CA        96.000      0      0.000 ! from CC X X CT1
CA C CT1 C         96.000      0      0.000 ! from CC X X CT1
C CT3 O CT2        96.000      0      0.000 ! from CC X X CT1
CA CA CA CT1       96.000      0      0.000 ! from CC X X CT1
CA CA CA OS        96.000      0      0.000 ! from CC X X CT1
CA OS C O          120.000     0      0.000 ! from O X X C
C CA CA CT1        96.000      0      0.000 ! from CC X X CT1
CA C CA O          120.000     0      0.000 ! from O X X C

```

### MM parameters for dextrometorphan:

Non standard atom types:

```

MASS  210 OCE  15.99900 O ! aromatic ether oxygen
MASS  211 NT  14.00700 N ! protonated tertiary amine nitrogen

```

MASS 212 CT0 12.01100 C ! aliphatic sp3 C bonded to 4 carbon  
 atoms,  
 MASS 213 N3 14.00700 N ! tertiary amine nitrogen

RESI DEX +1.000 ! protonated dextromethorphan  
 GROUP

|      |     |     |        |     |    |     |    |     |
|------|-----|-----|--------|-----|----|-----|----|-----|
| ATOM | C1  | CT2 | -0.180 |     |    |     |    |     |
| ATOM | C2  | CT0 | 0.000  |     |    |     |    |     |
| ATOM | C3  | CT1 | -0.090 |     |    |     |    |     |
| ATOM | C4  | CT2 | -0.180 |     |    |     |    |     |
| ATOM | C5  | CT2 | -0.180 |     |    |     |    |     |
| ATOM | C6  | CT2 | -0.180 |     |    |     |    |     |
| ATOM | C7  | CT1 | 0.120  |     |    |     |    |     |
| ATOM | C8  | CT2 | -0.180 |     |    |     |    |     |
| ATOM | C9  | CA  | 0.000  |     |    |     |    |     |
| ATOM | C10 | CA  | 0.000  |     |    |     |    |     |
| ATOM | C11 | CA  | -0.110 |     |    |     |    |     |
| ATOM | C12 | CA  | -0.110 |     |    |     |    |     |
| ATOM | C13 | CA  | 0.170  |     |    |     |    |     |
| ATOM | C14 | CA  | -0.110 |     |    |     |    |     |
| ATOM | N15 | NT  | 0.050  |     |    |     |    |     |
| ATOM | C16 | CT2 | 0.030  |     |    |     |    |     |
| ATOM | C17 | CT2 | -0.180 |     |    |     |    |     |
| ATOM | O18 | OCE | -0.340 |     |    |     |    |     |
| ATOM | C19 | CT3 | -0.100 |     |    |     |    |     |
| ATOM | C20 | CT3 | -0.060 |     |    |     |    |     |
| ATOM | H21 | HA  | 0.090  |     |    |     |    |     |
| ATOM | H22 | HA  | 0.090  |     |    |     |    |     |
| ATOM | H23 | HA  | 0.090  |     |    |     |    |     |
| ATOM | H24 | HP  | 0.110  |     |    |     |    |     |
| ATOM | H25 | HA  | 0.090  |     |    |     |    |     |
| ATOM | H26 | HA  | 0.090  |     |    |     |    |     |
| ATOM | H27 | HA  | 0.090  |     |    |     |    |     |
| ATOM | H28 | HA  | 0.090  |     |    |     |    |     |
| ATOM | H29 | HA  | 0.090  |     |    |     |    |     |
| ATOM | H30 | HA  | 0.090  |     |    |     |    |     |
| ATOM | H31 | HA  | 0.090  |     |    |     |    |     |
| ATOM | H32 | HA  | 0.090  |     |    |     |    |     |
| ATOM | H33 | HA  | 0.090  |     |    |     |    |     |
| ATOM | H34 | HA  | 0.090  |     |    |     |    |     |
| ATOM | H35 | HA  | 0.090  |     |    |     |    |     |
| ATOM | H36 | HP  | 0.110  |     |    |     |    |     |
| ATOM | H37 | HP  | 0.110  |     |    |     |    |     |
| ATOM | H38 | HA  | 0.090  |     |    |     |    |     |
| ATOM | H39 | HA  | 0.090  |     |    |     |    |     |
| ATOM | H40 | HA  | 0.090  |     |    |     |    |     |
| ATOM | H41 | HA  | 0.090  |     |    |     |    |     |
| ATOM | H42 | HA  | 0.090  |     |    |     |    |     |
| ATOM | H43 | HA  | 0.090  |     |    |     |    |     |
| ATOM | H44 | HA  | 0.090  |     |    |     |    |     |
| ATOM | H45 | HA  | 0.090  |     |    |     |    |     |
| ATOM | H46 | HC  | 0.320  |     |    |     |    |     |
| BOND | C1  | C2  | C1     | C6  | C1 | H44 | C1 | H45 |
| BOND | C2  | C3  | C2     | C10 | C2 | C17 | C3 | C4  |
| BOND | C3  | C7  | C3     | H25 | C4 | C5  | C4 | H38 |
| BOND | C4  | H39 | C5     | C6  | C5 | H40 | C5 | H41 |
| BOND | C6  | H42 | C6     | H43 | C7 | C8  | C7 | N15 |

```

BOND  C7  H26    C8  C9    C8  H34    C8  H35
BOND  C9  C10    C9  C11   C10  C14    C11  C12
BOND  C11 H36    C12 C13   C12  H37    C13  C14
BOND  C13 O18    C14 H24   N15  C16    N15  C20
BOND  N15 H46    C16 C17   C16  H30    C16  H31
BOND  C17 H32    C17 H33   O18  C19    C19  H21
BOND  C19 H22    C19 H23   C20  H27    C20  H28
BOND  C20 H29
IMPR  C9   C10   C11  C8
IMPR  C10  C9    C14  C2
IMPR  C14  C10   C13  H24
IMPR  C13  O18   C12  C14
IMPR  C12  C13   C11  H37
IMPR  C11  C12   C9   H36
PATCHING FIRS NONE LAST NONE

```

```

RESI  DEP          +0.000 ! non-protonated dextromethorphan
GROUP
ATOM  C1  CT2      -0.180
ATOM  C2  CT0       0.000
ATOM  C3  CT1     -0.090
ATOM  C4  CT2     -0.180
ATOM  C5  CT2     -0.180
ATOM  C6  CT2     -0.180
ATOM  C7  CT1      0.120
ATOM  C8  CT2     -0.180
ATOM  C9   CA      0.000
ATOM  C10  CA      0.000
ATOM  C11  CA     -0.110
ATOM  C12  CA     -0.110
ATOM  C13  CA      0.170
ATOM  C14  CA     -0.110
ATOM  N15  N3     -0.630
ATOM  C16  CT2      0.030
ATOM  C17  CT2     -0.180
ATOM  O18  OCE    -0.340
ATOM  C19  CT3    -0.100
ATOM  C20  CT3    -0.060
ATOM  H21  HA      0.090
ATOM  H22  HA      0.090
ATOM  H23  HA      0.090
ATOM  H24  HP      0.110
ATOM  H25  HA      0.090
ATOM  H26  HA      0.090
ATOM  H27  HA      0.090
ATOM  H28  HA      0.090
ATOM  H29  HA      0.090
ATOM  H30  HA      0.090
ATOM  H31  HA      0.090
ATOM  H32  HA      0.090
ATOM  H33  HA      0.090
ATOM  H34  HA      0.090
ATOM  H35  HA      0.090
ATOM  H36  HP      0.110
ATOM  H37  HP      0.110
ATOM  H38  HA      0.090
ATOM  H39  HA      0.090
ATOM  H40  HA      0.090

```

```

ATOM  H41  HA      0.090
ATOM  H42  HA      0.090
ATOM  H43  HA      0.090
ATOM  H44  HA      0.090
ATOM  H45  HA      0.090
BOND  C1   C2     C1   C6     C1   H44     C1   H45
BOND  C2   C3     C2   C10    C2   C17     C3   C4
BOND  C3   C7     C3   H25    C4   C5      C4   H38
BOND  C4   H39    C5   C6     C5   H40     C5   H41
BOND  C6   H42    C6   H43    C7   C8      C7   N15
BOND  C7   H26    C8   C9     C8   H34     C8   H35
BOND  C9   C10    C9   C11    C10  C14     C11  C12
BOND  C11  H36    C12  C13    C12  H37     C13  C14
BOND  C13  O18    C14  H24    N15  C16     N15  C20
BOND  C16  C17    C16  H30    C16  H31
BOND  C17  H32    C17  H33    O18  C19     C19  H21
BOND  C19  H22    C19  H23    C20  H27     C20  H28
BOND  C20  H29
IMPR  C9   C10    C11  C8
IMPR  C10  C9     C14  C2
IMPR  C14  C10    C13  H24
IMPR  C13  O18    C12  C14
IMPR  C12  C13    C11  H37
IMPR  C11  C12    C9   H36
ACCEPTOR N15
ACCEPTOR O18
PATCHING FIRS NONE LAST NONE

```

BONDS

```

!
!V(bond) = Kb(b - b0)**2
!
!Kb: kcal/mole/A**2
!b0: A
!
!atom type    Kb          b0
!

```

```

CT1  NT    119.686    1.5470
CA   OCE   369.634    1.3543
NT   CT2   176.892    1.5194
NT   CT3   254.400    1.4990
NT   HC    385.785    1.0259
CT3  OCE   113.647    1.415
CT0  CT1   218.894    1.5000
CT0  CT2   211.180    1.5380
CT0  CA    387.525    1.4900

```

!parameters for deprotonated DEX (DEP) values are taken from the amine stream files

!the amine nitrogen is N3 in this case

```

!N3  CNT3   235.000    1.4540
N3   CT3    235.000    1.4540
N3   CT1    235.000    1.4540
N3   CT2    235.000    1.4540

```

ANGLES

!

```

!V(angle) = Ktheta(Theta - Theta0)**2
!
!V(Urey-Bradley) = Kub(S - S0)**2
!
!Ktheta: kcal/mole/rad**2
!Theta0: degrees
!Kub: kcal/mole/A**2 (Urey-Bradley)
!S0: A
!
!atom types      Ktheta      Theta0      Kub      S0
!
NT   CT1  CT1    67.700    110.0
NT   CT1  CT2    67.700     110.0
NT   CT2  CT2    67.700     110.0
CA   CA   OCE    45.200     120.0
CT1  NT   CT2    50.000     113.0
CT1  NT   CT3    50.000     113.0
CT2  NT   CT3    50.000     112.0
NT   CT3  HA     45.000    107.50    35.00    2.10100
NT   CT2  HA     45.000    107.50    35.00    2.10100
NT   CT1  HA     45.000    107.50    35.00    2.10100
HC   NT   CT1    30.000    109.50    20.00    2.07400
HC   NT   CT2    30.000    109.50    20.00    2.07400
HC   NT   CT3    30.000    109.50    20.00    2.07400
CA   OCE  CT3    95.000     118.71
OCE  CT3  HA     60.00     109.5
CT2  CT2  CT0    58.350    113.50    11.16    2.56100
CT2  CT1  CT0    53.350    111.0     8.00     2.56100
CT1  CT1  CT0    53.350    111.0     8.00     2.56100
HA   CT2  CT0    33.430    110.10    22.53    2.17900
CT2  CT0  CT1    53.350    109.0     8.00     2.56100
CT2  CT0  CT2    53.350    110.0     8.00     2.56100
CT2  CT0  CA     53.350    109.5     8.00     2.56100
CT1  CT0  CA     53.350    109.0     8.00     2.56100
CT0  CA   CA     45.800    120.60
CT0  CT1  HA     34.500    110.10    22.53    2.17900
N3   CT3  HA     35.000    109.50    50.00    2.14000
N3   CT2  HA     35.000    109.50    50.00    2.14000
N3   CT1  HA     35.000    109.50    50.00    2.14000
CT3  N3   CT1    53.000    110.90
CT2  N3   CT1    53.000    110.90
CT2  N3   CT3    53.000    110.90
N3   CT1  CT1    67.700    110.90
N3   CT1  CT2    67.700    110.0
N3   CT2  CT2    67.700    110.0

```

DIHEDRALS

```

!
!V(dihedral) = Kchi(1 + cos(n(chi) - delta))
!
!Kchi: kcal/mole
!n: multiplicity
!delta: degrees
!
!atom types      Kchi      n      delta
!
CT0  CA   CA   CA     3.1000    2     180.00

```

|             |      |     |      |        |   |        |                        |
|-------------|------|-----|------|--------|---|--------|------------------------|
| CT2         | CA   | CA  | CT0  | 4.2000 | 2 | 180.00 |                        |
| HP          | CA   | CA  | CT0  | 4.2000 | 2 | 180.00 |                        |
| HP          | CA   | CA  | OCE  | 1.256  | 2 | 180.00 |                        |
| OCE         | CA   | CA  | CA   | 1.0000 | 2 | 180.00 |                        |
| CA          | CA   | OCE | CT3  | 1.4170 | 2 | 180.00 |                        |
| CA          | OCE  | CT3 | HA   | 0.5760 | 3 | 0.00   |                        |
| CA          | CT0  | CT1 | CT2  | 0.0400 | 3 | 0.00   |                        |
| CA          | CT0  | CT1 | CT1  | 0.0400 | 3 | 0.00   |                        |
| CA          | CT0  | CT1 | HA   | 0.0400 | 3 | 0.00   |                        |
| CA          | CT0  | CT2 | CT2  | 0.5402 | 3 | 0.00   |                        |
| HA          | CT2  | CT0 | CA   | 0.0400 | 3 | 0.00   |                        |
| CT2         | CT0  | CT1 | CT2  | 0.1500 | 1 | 0.00   |                        |
| CT2         | CT0  | CT1 | CT1  | 0.1500 | 1 | 0.00   |                        |
| CT2         | CT0  | CT1 | HA   | 0.4435 | 3 | 0.00   |                        |
| CT2         | CT0  | CA  | CA   | 0.2300 | 2 | 180.00 |                        |
| CT1         | CT0  | CA  | CA   | 0.2300 | 2 | 180.00 |                        |
| CT2         | CT0  | CT2 | CT2  | 0.2000 | 3 | 0.00   |                        |
| CT2         | CT0  | CT2 | HA   | 0.2000 | 3 | 0.00   |                        |
| CT1         | CT0  | CT2 | CT2  | 0.2000 | 3 | 0.00   |                        |
| CT1         | CT0  | CT2 | HA   | 0.2000 | 3 | 0.00   |                        |
| CT1         | CT1  | NT  | CT2  | 0.1000 | 3 | 0.00   |                        |
| CT1         | CT1  | NT  | CT3  | 0.1000 | 3 | 0.00   |                        |
| CT1         | CT1  | NT  | HC   | 0.1000 | 3 | 0.00   |                        |
| CT2         | CT1  | NT  | CT2  | 0.1000 | 3 | 0.00   |                        |
| CT2         | CT1  | NT  | CT3  | 0.1000 | 3 | 0.00   |                        |
| CT2         | CT1  | NT  | HC   | 0.1000 | 3 | 0.00   |                        |
| HA          | CT1  | NT  | CT2  | 0.1000 | 3 | 0.00   |                        |
| HA          | CT1  | NT  | CT3  | 0.1000 | 3 | 0.00   |                        |
| HA          | CT1  | NT  | HC   | 0.1000 | 3 | 0.00   |                        |
| CT1         | NT   | CT2 | CT2  | 0.1000 | 3 | 0.00   |                        |
| CT1         | NT   | CT2 | HA   | 0.1000 | 3 | 0.00   |                        |
| CT3         | NT   | CT2 | CT2  | 0.1000 | 3 | 0.00   |                        |
| CT3         | NT   | CT2 | HA   | 0.1000 | 3 | 0.00   |                        |
| HC          | NT   | CT2 | CT2  | 0.1000 | 3 | 0.00   |                        |
| HC          | NT   | CT2 | HA   | 0.1000 | 3 | 0.00   |                        |
| CT1         | NT   | CT3 | HA   | 0.1000 | 3 | 251.15 |                        |
| CT2         | NT   | CT3 | HA   | 0.1000 | 3 | 0.00   |                        |
| HC          | NT   | CT3 | HA   | 0.1000 | 3 | 0.00   | ! from the amine       |
| stream file |      |     |      |        |   |        |                        |
| !HNA3       | CNT3 | N3  | CNT3 | 0.3150 | 3 | 0.00   | !fitting to exptl      |
| data        |      |     |      |        |   |        |                        |
| HA          | CT3  | N3  | CT1  | 0.3150 | 3 | 0.00   | !fitting to exptl data |
| HA          | CT3  | N3  | CT2  | 0.3150 | 3 | 0.00   | !fitting to exptl data |
| HA          | CT1  | N3  | CT2  | 0.3150 | 3 | 0.00   | !fitting to exptl data |
| HA          | CT1  | N3  | CT3  | 0.3150 | 3 | 0.00   | !fitting to exptl data |
| HA          | CT2  | N3  | CT1  | 0.3150 | 3 | 0.00   | !fitting to exptl data |
| HA          | CT2  | N3  | CT3  | 0.3150 | 3 | 0.00   | !fitting to exptl data |
| X           | CT1  | N3  | X    | 0.3150 | 3 | 0.00   | !from HS CT1 N3 CT2    |
| X           | CT2  | N3  | X    | 0.3150 | 3 | 0.00   | !from HS CT1 N3 CT2    |

IMPROPER

!

!V(improper) = Kpsi(psi - psi0)\*\*2

!

!Kpsi: kcal/mole/rad\*\*2

!psi0: degrees

!note that the second column of numbers (0) is ignored

!

```

!atom types          Kpsi          0 psi0
!
CA CA CA HP          20.000    0 0.000    ! from HA CPB C C (heme)
CA CA CA CT2         96.000    0 0.000    ! from CC X X CT1
CA CA CA CT0         96.000    0 0.000    ! from CC X X CT1
CA OCE CA CA         96.000    0 0.000    ! from CC X X CT1
CT1 N3 CT2 CT3      15.6000    0 120.0000

NONBONDED nbxmod 5 atom cdiel shift vatom vdistance vswitch -
cutnb 14.0 ctofnb 12.0 ctonnb 10.0 eps 1.0 e14fac 1.0 wmin 1.5
!adm jr., 5/08/91, suggested cutoff scheme
!
!V(Lennard-Jones) = Eps(i,j)*[(Rmin(i,j)/r(i,j))**12 -
2(Rmin(i,j)/r(i,j))**6]
!
!epsilon [kcal/mole]: Eps(i,j) = sqrt(eps(i) * eps(j))
!Rmin/2 [A]:          Rmin(i,j) = Rmin/2(i) + Rmin/2(j)
!
!atom ignored epsilon Rmin/2 ignored eps,1-4
Rmin/2,1-4
!

NT 0.0 -0.2000 1.8500 !
OCE 0.0 -0.1521 1.7700 !
CT0 0.0 -0.0200 2.275 0.0 -0.01 1.9 ! from CT, from CT1x
N3 0.0 -0.0350 2.000
END

```



**Part B** Absolute energies (in atomic units) for all computed species. All QM and QM/MM energies were calculated at the B3LYP/6-31G\* level of theory (with LACVP for Fe).

|                                          |                |                             |               |
|------------------------------------------|----------------|-----------------------------|---------------|
| QM energy of triplet oxygen atom         | $E_{QM}O$      | =                           | -75.0573242   |
| QM energy of relaxed Fe(III) porphyrin   | $E_{QM}(Fe)$   | =                           | -1510.614765  |
| QM energy of unrelaxed Fe(III) porphyrin | $E_{QM}(Fe^*)$ | =                           | -1510.653854  |
| Relaxation energy                        | =              | $E_{QM}(Fe) - E_{QM}(Fe^*)$ | = 0.039089017 |

Table S1 Absolute QM/MM energies for Compound I ( $E_{\text{QM/MM}}(\text{FeO})$ ) and unrelaxed Fe(III) resting state ( $E_{\text{QM/MM}}(\text{Fe}^*)$ ) in the **2C9\_apo** simulation

| Snapshot [ps] | $E_{\text{QM/MM}}(\text{FeO})$ | $E_{\text{QM/MM}}(\text{Fe}^*)$ |
|---------------|--------------------------------|---------------------------------|
| <b>0</b>      | -1636.907377                   | -1561.707872                    |
| <b>200</b>    | -1636.82625                    | -1561.633356                    |
| <b>400</b>    | -1636.893422                   | -1561.711793                    |
| <b>600</b>    | -1636.391303                   | -1561.208728                    |
| <b>800</b>    | -1637.596848                   | -1562.403147                    |
| <b>1000</b>   | -1638.148509                   | -1562.949302                    |
| <b>1200</b>   | -1637.611517                   | -1562.402052                    |
| <b>1400</b>   | -1637.516744                   | -1562.329535                    |
| <b>1600</b>   | -1637.603194                   | -1562.410317                    |
| <b>1800</b>   | -1638.217694                   | -1563.026913                    |
| <b>2000</b>   | -1639.996712                   | -1564.80418                     |
| <b>2200</b>   | -1637.638259                   | -1562.454109                    |
| <b>2400</b>   | -1637.005229                   | -1561.812395                    |
| <b>2600</b>   | -1637.836285                   | -1562.632844                    |
| <b>2800</b>   | -1637.469693                   | -1562.281352                    |
| <b>3000</b>   | -1638.186007                   | *                               |
| <b>3200</b>   | -1638.078274                   | -1562.891212                    |
| <b>3400</b>   | -1639.977814                   | -1564.792337                    |
| <b>3600</b>   | -1637.425406                   | -1562.236322                    |
| <b>3800</b>   | -1637.476232                   | -1562.287394                    |
| <b>4000</b>   | -1638.673403                   | -1563.488725                    |
| <b>4200</b>   | -1638.593623                   | -1563.401051                    |
| <b>4400</b>   | -1638.94762                    | -1563.749573                    |
| <b>4600</b>   | -1638.566883                   | -1563.378925                    |
| <b>4800</b>   | -1638.035674                   | -1562.831822                    |
| <b>5000</b>   | -1638.341865                   | -1563.13747                     |

Table S2 Absolute QM/MM energies for Compound I ( $E_{\text{QM/MM}}(\text{FeO})$ ) and unrelaxed Fe(III) resting state ( $E_{\text{QM/MM}}(\text{Fe}^*)$ ) in the **2C9\_prox** simulation

| Snapshot [ps] | $E_{\text{QM/MM}}(\text{FeO})$ | $E_{\text{QM/MM}}(\text{Fe}^*)$ |
|---------------|--------------------------------|---------------------------------|
| 0             | -2211.369373                   | -2136.19929                     |
| 200           | -2209.898663                   | -2134.720503                    |
| 400           | -2210.080927                   | -2134.897184                    |
| 600           | -2209.552079                   | -2134.373783                    |
| 800           | -2209.923604                   | -2134.748977                    |
| 1000          | -2209.444388                   | -2134.260259                    |
| 1200          | -2211.348313                   | -2136.163837                    |
| 1400          | -2210.501299                   | -2135.318172                    |
| 1600          | -2210.842599                   | -2135.659211                    |
| 1800          | -2210.212184                   | -2135.031005                    |
| 2000          | -2209.649563                   | -2134.465454                    |
| 2200          | -2210.259975                   | -2135.078412                    |
| 2400          | -2210.459221                   | -2135.281036                    |
| 2600          | -2209.848896                   | -2134.66971                     |
| 2800          | -2209.5128                     | -2134.330237                    |
| 3000          | -2210.541031                   | -2135.360884                    |
| 3200          | -2210.939025                   | -2135.760973                    |
| 3400          | -2209.922657                   | -2134.740267                    |
| 3600          | -2210.533676                   | -2135.355504                    |
| 3800          | -2210.276736                   | -2135.086851                    |
| 4000          | -2210.579494                   | -2135.381345                    |
| 4200          | -2210.478699                   | -2135.274207                    |
| 4400          | -2210.141375                   | -2134.944585                    |
| 4600          | -2211.045436                   | -2135.845662                    |
| 4800          | -2211.201947                   | -2135.98314                     |
| 5000          | -2210.643981                   | -2135.449476                    |

Table S3 Absolute QM/MM energies for Compound I ( $E_{\text{QM/MM}}(\text{FeO})$ ) and unrelaxed Fe(III) resting state ( $E_{\text{QM/MM}}(\text{Fe}^*)$ ) in the **2C9\_dist** simulation

| Snapshot [ps] | $E_{\text{QM/MM}}(\text{FeO})$ | $E_{\text{QM/MM}}(\text{Fe}^*)$ |
|---------------|--------------------------------|---------------------------------|
| 0             | -2209.801979                   | -2134.623378                    |
| 200           | -2209.849037                   | -2134.67259                     |
| 400           | -2209.814915                   | -2134.637421                    |
| 600           | -2210.838288                   | -2135.666213                    |
| 800           | -2209.295205                   | -2134.108396                    |
| 1000          | -2209.962773                   | -2134.773681                    |
| 1200          | -2208.770515                   | -2133.590192                    |
| 1400          | -2209.306404                   | -2134.126617                    |
| 1600          | -2209.772847                   | -2134.589697                    |
| 1800          | -2210.299001                   | -2135.122875                    |
| 2000          | -2210.818539                   | -2135.631277                    |
| 2200          | -2209.441458                   | -2134.25566                     |
| 2400          | -2210.480465                   | -2135.295543                    |
| 2600          | -2210.516308                   | -2135.326721                    |
| 2800          | -2212.854697                   | -2137.670703                    |
| 3000          | -2210.14149                    | -2134.944658                    |
| 3200          | -2210.047482                   | -2134.864727                    |
| 3400          | -2210.024975                   | -2134.832673                    |
| 3600          | -2210.470527                   | -2135.279824                    |
| 3800          | -2210.9494                     | -2135.765246                    |
| 4000          | -2211.733565                   |                                 |
| 4200          | -2208.860542                   | -2133.677887                    |
| 4400          | -2209.814868                   | -2134.619075                    |
| 4600          | -2211.07056                    | -2135.88986                     |
| 4800          | -2210.790471                   | -2135.609404                    |
| 5000          | -2210.544899                   | -2135.35977                     |

Table S4 Absolute QM/MM energies for Compound I ( $E_{\text{QM/MM}}(\text{FeO})$ ) and unrelaxed Fe(III) resting state ( $E_{\text{QM/MM}}(\text{Fe}^*)$ ) in the **2C9\_2warf** simulation

| Snapshot [ps] | $E_{\text{QM/MM}}(\text{FeO})$ | $E_{\text{QM/MM}}(\text{Fe}^*)$ |
|---------------|--------------------------------|---------------------------------|
| 0             | -2209.090584                   | -2133.919761                    |
| 200           | -2208.484447                   | -2133.311804                    |
| 400           | *                              | *                               |
| 600           | *                              | *                               |
| 800           | -2210.109172                   | -2134.929779                    |
| 1000          | -2209.987435                   | -2134.812278                    |
| 1200          | -2209.290539                   | -2134.1096                      |
| 1400          | -2210.158613                   | -2134.977607                    |
| 1600          | -2209.419077                   | -2134.242999                    |
| 1800          | -2209.445886                   | -2134.271231                    |
| 2000          | -2210.011443                   | -2134.834679                    |
| 2200          | -2211.247532                   | -2136.075983                    |
| 2400          | -2209.993419                   | -2134.816796                    |
| 2600          | -2210.454279                   | -2135.285223                    |
| 2800          | -2210.26779                    | -2135.093347                    |
| 3000          | -2209.859789                   | -2134.68529                     |
| 3200          | -2209.702458                   | -2134.530128                    |
| 3400          | -2209.092298                   | -2133.920762                    |
| 3600          | -2211.543866                   | -2136.367615                    |
| 3800          | -2209.690391                   | -2134.514031                    |
| 4000          | -2209.813105                   | -2134.622426                    |
| 4200          | -2210.039606                   | -2134.86509                     |
| 4400          | -2210.745014                   | -2135.5627                      |
| 4600          | -2210.909464                   | -2135.727775                    |
| 4800          | -2210.765019                   | -2135.584155                    |
| 5000          | -2210.214085                   | -2135.03753                     |

Table S5 Absolute QM/MM energies for Compound I ( $E_{\text{QM/MM}}(\text{FeO})$ ) and unrelaxed Fe(III) resting state ( $E_{\text{QM/MM}}(\text{Fe}^*)$ ) in the **2D6\_apo** simulation

| Snapshot [ps] | $E_{\text{QM/MM}}(\text{FeO})$ | $E_{\text{QM/MM}}(\text{Fe}^*)$ |
|---------------|--------------------------------|---------------------------------|
| 0             | -1638.014747                   | -1562.844551                    |
| 200           | -1640.779478                   | -1565.602414                    |
| 400           | -1641.209776                   | -1566.034947                    |
| 600           | -1641.211843                   | -1566.035982                    |
| 800           | -1641.658926                   | -1566.485364                    |
| 1000          | -1641.600708                   | -1566.41687                     |
| 1200          | -1641.587276                   | -1566.409671                    |
| 1400          | -1641.338209                   | -1566.166141                    |
| 1600          | -1641.999665                   | -1566.823241                    |
| 1800          | -1641.519998                   | -1566.339204                    |
| 2000          | -1641.475185                   | -1566.297585                    |
| 2200          | -1641.621403                   | -1566.444089                    |
| 2400          | -1641.859497                   | -1566.681695                    |
| 2600          | -1642.389482                   | -1567.209481                    |
| 2800          | -1641.713168                   | -1566.533457                    |
| 3000          | -1641.891379                   | -1566.697581                    |
| 3200          | -1642.161189                   | -1566.971878                    |
| 3400          | -1642.218429                   | -1567.018099                    |
| 3600          | -1642.479438                   | -1567.288124                    |
| 3800          | -1642.623911                   | -1567.430351                    |
| 4000          | -1642.28249                    | -1567.089023                    |
| 4200          | -1642.103164                   | -1566.910081                    |
| 4400          | -1642.479087                   | -1567.275286                    |
| 4600          | -1641.991913                   | -1566.789938                    |
| 4800          | -1642.333912                   | -1567.147974                    |
| 5000          | -1642.261348                   | -1567.070494                    |

Table S6 Absolute QM/MM energies for Compound I ( $E_{\text{QM/MM}}(\text{FeO})$ ) and unrelaxed Fe(III) resting state ( $E_{\text{QM/MM}}(\text{Fe}^*)$ ) in the **2D6\_dex** simulation

| Snapshot [ps] | $E_{\text{QM/MM}}(\text{FeO})$ | $E_{\text{QM/MM}}(\text{Fe}^*)$ |
|---------------|--------------------------------|---------------------------------|
| 0             | -1987.259326                   | -1912.080665                    |
| 200           | -1987.456249                   | -1912.284676                    |
| 400           | -1988.092333                   | -1912.92082                     |
| 600           | -1987.445434                   | -1912.274539                    |
| 800           | -1988.469274                   | -1913.298814                    |
| 1000          | -1987.699525                   | -1912.52847                     |
| 1200          | -1988.433186                   | -1913.257741                    |
| 1400          | -1987.716698                   | -1912.54414                     |
| 1600          | -1988.618842                   | -1913.447775                    |
| 1800          | -1987.931326                   | -1912.760063                    |
| 2000          | -1988.108817                   | -1912.93762                     |
| 2200          | -1988.065904                   | -1912.893367                    |
| 2400          | -1988.36517                    | -1913.191774                    |
| 2600          | -1988.744976                   | -1913.574956                    |
| 2800          | -1988.503928                   | -1913.330982                    |
| 3000          | -1988.570046                   | -1913.386814                    |
| 3200          | -1988.304542                   | -1913.129719                    |
| 3400          | -1988.524511                   | -1913.345364                    |
| 3600          | -1988.072428                   | -1912.892492                    |
| 3800          | -1988.144973                   | -1912.966853                    |
| 4000          | -1988.506091                   | -1913.330629                    |
| 4200          | -1988.309299                   | -1913.128781                    |
| 4400          | -1988.059865                   | -1912.882908                    |
| 4600          | -1988.551285                   | -1913.369875                    |
| 4800          | -1988.850023                   | -1913.67086                     |
| 5000          | -1988.250416                   | -1913.075667                    |

Table S7 Absolute QM/MM energies for Compound I ( $E_{\text{QM/MM}}(\text{FeO})$ ) and unrelaxed Fe(III) resting state ( $E_{\text{QM/MM}}(\text{Fe}^*)$ ) in the **3A4\_apo** simulation

| Snapshot [ps] | $E_{\text{QM/MM}}(\text{FeO})$ | $E_{\text{QM/MM}}(\text{Fe}^*)$ |
|---------------|--------------------------------|---------------------------------|
| 0             | -1637.836979                   | -1562.659449                    |
| 200           | -1637.93327                    | -1562.743602                    |
| 400           | -1638.374702                   | -1563.197103                    |
| 600           | -1637.976058                   | -1562.795303                    |
| 800           | -1637.575963                   | -1562.389738                    |
| 1000          | -1639.020723                   | -1563.838428                    |
| 1200          | -1637.42385                    | -1562.234942                    |
| 1400          | -1638.374484                   | -1563.187701                    |
| 1600          | -1638.322488                   | -1563.140894                    |
| 1800          | -1638.041727                   | -1562.85689                     |
| 2000          | -1638.353595                   | -1563.168274                    |
| 2200          | -1638.763795                   | -1563.579384                    |
| 2400          | -1638.386076                   | -1563.198847                    |
| 2600          | -1638.184974                   | -1563.000893                    |
| 2800          | -1637.498243                   | -1562.296645                    |
| 3000          | -1637.496843                   | -1562.312704                    |
| 3200          | -1639.06221                    | -1563.874851                    |
| 3400          | -1638.910872                   | -1563.727767                    |
| 3600          | -1637.693371                   | -1562.504458                    |
| 3800          | -1638.696138                   | -1563.513448                    |
| 4000          | -1637.164234                   | -1561.984612                    |
| 4200          | -1639.37596                    | -1564.199479                    |
| 4400          | -1638.953997                   | -1563.769435                    |
| 4600          | -1638.740077                   | -1563.559743                    |
| 4800          | -1638.912378                   | -1563.731206                    |
| 5000          | -1637.61744                    | -1562.44117                     |



Table S8 Absolute QM/MM energies for Compound I ( $E_{\text{QM/MM}}(\text{FeO})$ ) and unrelaxed Fe(III) resting state ( $E_{\text{QM/MM}}(\text{Fe}^*)$ ) in the **3A4\_dex** simulation

| Snapshot [ps] | $E_{\text{QM/MM}}(\text{FeO})$ | $E_{\text{QM/MM}}(\text{Fe}^*)$ |
|---------------|--------------------------------|---------------------------------|
| 0             | -1637.196334                   | -1562.015364                    |
| 200           | -1637.593503                   | -1562.411155                    |
| 400           | -1639.365531                   | -1564.177474                    |
| 600           | -1637.807129                   | -1562.624513                    |
| 800           | -1638.476493                   | -1563.291296                    |
| 1000          | -1638.366614                   | -1563.182127                    |
| 1200          | -1637.023858                   | -1561.840734                    |
| 1400          | -1637.907142                   | -1562.727748                    |
| 1600          | -1637.560466                   | -1562.385689                    |
| 1800          | -1638.511888                   | -1563.327051                    |
| 2000          | -1638.035538                   | -1562.851033                    |
| 2200          | -1637.997945                   | -1562.815032                    |
| 2400          | -1637.848372                   | -1562.658468                    |
| 2600          | -1638.816799                   | -1563.638855                    |
| 2800          | -1637.56859                    | -1562.390537                    |
| 3000          | -1637.22953                    | -1562.04586                     |
| 3200          | -1638.270617                   | -1563.082057                    |
| 3400          | -1638.555299                   | -1563.374452                    |
| 3600          | -1639.133401                   | -1563.947407                    |
| 3800          | -1637.936961                   | -1562.755451                    |
| 4000          | -1638.482263                   | -1563.299429                    |
| 4200          | -1637.98119                    | -1562.793872                    |
| 4400          | -1637.761715                   | -1562.582114                    |
| 4600          | -1638.718599                   | -1563.530535                    |
| 4800          | -1638.870809                   | -1563.677533                    |
| 5000          | -1638.097815                   | -1562.909308                    |

Table S9 Absolute QM/MM energies for Compound I ( $E_{\text{QM/MM}}(\text{FeO})$ ) and unrelaxed Fe(III) resting state ( $E_{\text{QM/MM}}(\text{Fe}^*)$ ) in the **P450<sub>cam\_</sub>apo** simulation

| Snapshot [ps] | $E_{\text{QM/MM}}(\text{FeO})$ | $E_{\text{QM/MM}}(\text{Fe}^*)$ |
|---------------|--------------------------------|---------------------------------|
| 0             | -1639.111762                   | -1563.928181                    |
| 200           | -1638.121693                   | -1562.939536                    |
| 400           | -1639.970799                   | -1564.794782                    |
| 600           | -1638.688537                   | -1563.511184                    |
| 800           | -1641.986597                   | -1566.807714                    |
| 1000          | -1642.923284                   | -1567.735062                    |
| 1200          | -1639.618909                   | -1564.432681                    |
| 1400          | -1637.536004                   | -1562.351091                    |
| 1600          | -1637.813228                   | -1562.635077                    |
| 1800          | -1636.459957                   | -1561.281569                    |
| 2000          | -1637.588059                   | -1562.412389                    |
| 2200          | -1639.216279                   | -1564.03621                     |
| 2400          | -1640.84631                    | -1565.663678                    |
| 2600          | -1638.335671                   | -1563.152518                    |
| 2800          | -1636.16733                    | -1560.967914                    |
| 3000          | -1637.127584                   | -1561.941452                    |
| 3200          | -1638.533717                   | -1563.354941                    |
| 3400          | -1639.121007                   | -1563.930711                    |
| 3600          | -1637.465421                   | -1562.282986                    |
| 3800          | -1637.248251                   | -1562.05867                     |
| 4000          | -1638.61852                    | -1563.420791                    |
| 4200          | -1636.126764                   | -1560.930846                    |
| 4400          | -1639.226436                   | -1564.043224                    |
| 4600          | -1638.006777                   | -1562.824499                    |
| 4800          | -1639.93946                    | -1564.756512                    |
| 5000          | -1637.883969                   | -1562.707619                    |

Table S10 Absolute QM/MM energies for Compound I ( $E_{\text{QM/MM}}(\text{FeO})$ ) and unrelaxed Fe(III) resting state ( $E_{\text{QM/MM}}(\text{Fe}^*)$ ) in the **P450<sub>cam</sub>\_prop** simulation

| Snapshot [ps] | $E_{\text{QM/MM}}(\text{FeO})$ | $E_{\text{QM/MM}}(\text{Fe}^*)$ |
|---------------|--------------------------------|---------------------------------|
| 0             | -1756.239667                   | -1681.060061                    |
| 200           | -1755.550799                   | -1680.372462                    |
| 400           | -1755.507125                   | -1680.331318                    |
| 600           | -1754.774692                   | -1679.59858                     |
| 800           | -1759.568876                   | -1684.39224                     |
| 1000          | -1758.434443                   | -1683.254936                    |
| 1200          | -1755.504909                   | -1680.324459                    |
| 1400          | -1755.512597                   | -1680.334612                    |
| 1600          | -1757.118153                   | -1681.938263                    |
| 1800          | -1756.039641                   | -1680.860267                    |
| 2000          | -1759.37413                    | -1684.191072                    |
| 2200          | -1755.816508                   | -1680.635724                    |
| 2400          | -1758.065581                   | -1682.888317                    |
| 2600          | -1756.02191                    | *                               |
| 2800          | -1754.992015                   | -1679.813666                    |
| 3000          | -1755.652733                   | -1680.474375                    |
| 3200          | -1757.093883                   | -1681.912133                    |
| 3400          | -1756.667105                   | -1681.487211                    |
| 3600          | -1755.315922                   | -1680.130683                    |
| 3800          | -1754.883525                   | -1679.701953                    |
| 4000          | -1761.734157                   | -1686.552884                    |
| 4200          | -1754.662712                   | -1679.471868                    |
| 4400          | -1755.470241                   | -1680.297057                    |
| 4600          | -1756.204112                   | -1681.022579                    |
| 4800          | -1755.411861                   | -1680.232131                    |
| 5000          | -1753.828087                   | -1678.648963                    |

**Part C Mulliken spin densities for QM/MM optimized snapshots of Compound I**

Table S11 Mulliken spin densities for individual fragments in QM/MM optimized snapshots of Compound I taken from the **2C9\_apo** MD simulation.

| Snapshot [ps] | $\rho(\text{Fe})$ | $\rho(\text{O})$ | $\rho(\text{S})$ | $\rho(\text{porphyrin})$ |
|---------------|-------------------|------------------|------------------|--------------------------|
| 0             | 1.16458           | 0.7704           | 0.46444          | 0.57491                  |
| 200           | 1.15865           | 0.77894          | 0.46042          | 0.57611                  |
| 400           | 1.15712           | 0.79073          | 0.34752          | 0.68449                  |
| 600           | 1.15017           | 0.79744          | 0.40028          | 0.62838                  |
| 800           | 1.16              | 0.77848          | 0.43152          | 0.60536                  |
| 1000          | *                 | *                | *                | *                        |
| 1200          | 1.19339           | 0.73095          | 0.54593          | 0.50152                  |
| 1400          | 1.14964           | 0.79372          | 0.3892           | 0.64502                  |
| 1600          | 1.15576           | 0.7825           | 0.43665          | 0.60299                  |
| 1800          | 1.15864           | 0.78327          | 0.4134           | 0.62062                  |
| 2000          | 1.15539           | 0.78359          | 0.41858          | 0.6168                   |
| 2200          | 1.1557            | 0.79144          | 0.35176          | 0.6821                   |
| 2400          | 1.22756           | 0.71554          | 0.31268          | 0.72794                  |
| 2600          | 1.22697           | 0.70616          | 0.45915          | 0.58054                  |
| 2800          | 1.15007           | 0.79276          | 0.41494          | 0.6185                   |
| 3000          | 1.16713           | 0.77768          | 0.35994          | 0.67524                  |
| 3200          | 1.15998           | 0.78368          | 0.36214          | 0.67344                  |
| 3400          | 1.15496           | 0.78729          | 0.40598          | 0.62966                  |
| 3600          | 1.17838           | 0.76608          | 0.38792          | 0.64642                  |
| 3800          | 1.16397           | 0.77651          | 0.41938          | 0.61547                  |
| 4000          | 1.14767           | 0.795            | 0.32154          | 0.71791                  |
| 4200          | 1.1641            | 0.77307          | 0.46269          | 0.57499                  |
| 4400          | 1.16529           | 0.76628          | 0.54878          | 0.4898                   |
| 4600          | 1.14955           | 0.79129          | 0.4609           | 0.57219                  |
| 4800          | 1.19952           | 0.72865          | 0.54413          | 0.49767                  |
| 5000          | 1.21418           | 0.71439          | 0.56547          | 0.47556                  |

Table S12 Mulliken spin densities for individual fragments in QM/MM optimized snapshots of Compound I taken from the **2C9\_prox** MD simulation.

| Snapshot [ps] | $\rho(\text{Fe})$ | $\rho(\text{O})$ | $\rho(\text{S})$ | $\rho(\text{porphyrin})$ |
|---------------|-------------------|------------------|------------------|--------------------------|
| <b>0</b>      | 1.1419            | 0.81784          | 0.41677          | 0.59695                  |
| <b>200</b>    | 1.14638           | 0.80393          | 0.52507          | 0.4956                   |
| <b>400</b>    | 1.1987            | 0.74574          | 0.46223          | 0.56682                  |
| <b>600</b>    | 1.191             | 0.76186          | 0.40521          | 0.61589                  |
| <b>800</b>    | 1.17584           | 0.77905          | 0.36049          | 0.65705                  |
| <b>1000</b>   | 1.19392           | 0.74885          | 0.47251          | 0.55455                  |
| <b>1200</b>   | 1.18681           | 0.75875          | 0.48864          | 0.53745                  |
| <b>1400</b>   | 1.20156           | 0.74013          | 0.45879          | 0.56989                  |
| <b>1600</b>   | 1.20576           | 0.73815          | 0.48517          | 0.53865                  |
| <b>1800</b>   | 1.20366           | 0.74154          | 0.47209          | 0.55214                  |
| <b>2000</b>   | 1.20589           | 0.7386           | 0.40525          | 0.62305                  |
| <b>2200</b>   | 1.21548           | 0.73126          | 0.40906          | 0.6181                   |
| <b>2400</b>   | 1.21561           | 0.73741          | 0.3774           | 0.64177                  |
| <b>2600</b>   | 1.20287           | 0.7493           | 0.41731          | 0.60194                  |
| <b>2800</b>   | 1.15606           | 0.78984          | 0.51649          | 0.50777                  |
| <b>3000</b>   | 1.14809           | 0.79489          | 0.50637          | 0.52087                  |
| <b>3200</b>   | 1.15752           | 0.78             | 0.56587          | 0.45641                  |
| <b>3400</b>   | 1.17254           | 0.76316          | 0.56323          | 0.46104                  |
| <b>3600</b>   | 1.15583           | 0.78378          | 0.5512           | 0.47071                  |
| <b>3800</b>   | 1.17745           | 0.75426          | 0.60567          | 0.42489                  |
| <b>4000</b>   | 1.18138           | 0.74661          | 0.7367           | 0.29064                  |
| <b>4200</b>   | 1.17918           | 0.74694          | 0.72577          | 0.30794                  |
| <b>4400</b>   | 1.18429           | 0.74624          | 0.64493          | 0.38731                  |
| <b>4600</b>   | 1.17466           | 0.75399          | 0.68184          | 0.35327                  |
| <b>4800</b>   | 1.20869           | 0.70331          | 0.8112           | 0.22731                  |
| <b>5000</b>   | 1.14728           | 0.79474          | 0.45989          | 0.56817                  |

Table S13 Mulliken spin densities for individual fragments in QM/MM optimized snapshots of Compound I taken from the **2C9\_dist** MD simulation.

| Snapshot [ps] | $\rho(\text{Fe})$ | $\rho(\text{O})$ | $\rho(\text{S})$ | $\rho(\text{porphyrin})$ |
|---------------|-------------------|------------------|------------------|--------------------------|
| <b>0</b>      | 1.1418            | 0.81121          | 0.32868          | 0.69943                  |
| <b>200</b>    | 1.14622           | 0.80949          | 0.35303          | 0.6705                   |
| <b>400</b>    | 1.13152           | 0.81949          | 0.42969          | 0.59374                  |
| <b>600</b>    | 1.11956           | 0.8342           | 0.41153          | 0.61109                  |
| <b>800</b>    | 1.1638            | 0.78084          | 0.47999          | 0.54852                  |
| <b>1000</b>   | 1.16592           | 0.77453          | 0.49357          | 0.53777                  |
| <b>1200</b>   | 1.14742           | 0.80471          | 0.44512          | 0.5778                   |
| <b>1400</b>   | 1.1588            | 0.79499          | 0.42368          | 0.59922                  |
| <b>1600</b>   | 1.17591           | 0.77634          | 0.42859          | 0.5954                   |
| <b>1800</b>   | 1.13482           | 0.82092          | 0.3785           | 0.644                    |
| <b>2000</b>   | 1.16062           | 0.78187          | 0.48587          | 0.54482                  |
| <b>2200</b>   | 1.15949           | 0.78407          | 0.42842          | 0.60387                  |
| <b>2400</b>   | 1.16646           | 0.77746          | 0.45885          | 0.57235                  |
| <b>2600</b>   | 1.18926           | 0.75254          | 0.53387          | 0.4946                   |
| <b>2800</b>   | 1.14811           | 0.79684          | 0.48111          | 0.54666                  |
| <b>3000</b>   | 1.16947           | 0.76633          | 0.54825          | 0.48636                  |
| <b>3200</b>   | 1.14971           | 0.79632          | 0.46141          | 0.56709                  |
| <b>3400</b>   | 1.16082           | 0.7786           | 0.47446          | 0.56045                  |
| <b>3600</b>   | 1.16726           | 0.77445          | 0.51473          | 0.51484                  |
| <b>3800</b>   | 1.16081           | 0.78652          | 0.49044          | 0.53386                  |
| <b>4000</b>   | 1.17577           | 0.76356          | 0.53235          | 0.4988                   |
| <b>4200</b>   | 1.16818           | 0.77988          | 0.44824          | 0.57864                  |
| <b>4400</b>   | 1.23419           | 0.70656          | 0.50821          | 0.52122                  |
| <b>4600</b>   | 1.18653           | 0.76493          | 0.45592          | 0.56576                  |
| <b>4800</b>   | 1.16562           | 0.78934          | 0.36219          | 0.66237                  |
| <b>5000</b>   | 1.16978           | 0.77901          | 0.46856          | 0.55692                  |

Table S14 Mulliken spin densities for individual fragments in QM/MM optimized snapshots of Compound I taken from the **2C9\_2warf** MD simulation.

| Snapshot [ps] | $\rho(\text{Fe})$ | $\rho(\text{O})$ | $\rho(\text{S})$ | $\rho(\text{porphyrin})$ |
|---------------|-------------------|------------------|------------------|--------------------------|
| <b>0</b>      | 1.1004            | 0.85087          | 0.40789          | 0.61346                  |
| <b>200</b>    | 1.1362            | 0.81208          | 0.41492          | 0.60971                  |
| <b>400</b>    | 1.11955           | 0.8383           | 0.34379          | 0.67498                  |
| <b>600</b>    | 1.11792           | 0.83417          | 0.38987          | 0.63253                  |
| <b>800</b>    | 1.13661           | 0.80731          | 0.46816          | 0.56016                  |
| <b>1000</b>   | 1.13425           | 0.81392          | 0.4153           | 0.61113                  |
| <b>1200</b>   | 1.14701           | 0.79636          | 0.42769          | 0.60345                  |
| <b>1400</b>   | 1.1443            | 0.79926          | 0.45974          | 0.56855                  |
| <b>1600</b>   | 1.14865           | 0.79897          | 0.43155          | 0.59006                  |
| <b>1800</b>   | 1.12366           | 0.82299          | 0.44662          | 0.57689                  |
| <b>2000</b>   | 1.15342           | 0.79387          | 0.40787          | 0.61966                  |
| <b>2200</b>   | 1.13761           | 0.81172          | 0.3743           | 0.64715                  |
| <b>2400</b>   | 1.13908           | 0.81016          | 0.39248          | 0.63126                  |
| <b>2600</b>   | 1.10761           | 0.84517          | 0.33439          | 0.68767                  |
| <b>2800</b>   | 1.12564           | 0.82042          | 0.45487          | 0.56555                  |
| <b>3000</b>   | 1.13021           | 0.82089          | 0.47228          | 0.54274                  |
| <b>3200</b>   | 1.13142           | 0.8204           | 0.32648          | 0.69729                  |
| <b>3400</b>   | 1.12339           | 0.82821          | 0.37613          | 0.64257                  |
| <b>3600</b>   | 1.13783           | 0.81639          | 0.38016          | 0.64068                  |
| <b>3800</b>   | 1.14384           | 0.80901          | 0.39449          | 0.62427                  |
| <b>4000</b>   | 1.15519           | 0.78367          | 0.50362          | 0.52938                  |
| <b>4200</b>   | 1.12901           | 0.82294          | 0.39102          | 0.63251                  |
| <b>4400</b>   | 1.17871           | 0.77872          | 0.34673          | 0.67664                  |
| <b>4600</b>   | 1.1373            | 0.81091          | 0.431            | 0.59024                  |
| <b>4800</b>   | 1.18166           | 0.76628          | 0.44405          | 0.57787                  |
| <b>5000</b>   | 1.17686           | 0.77857          | 0.31924          | 0.7049                   |

Table S15 Mulliken spin densities for individual fragments in QM/MM optimized snapshots of Compound I taken from the **2D6\_apo** MD simulation.

| Snapshot [ps] | $\rho(\text{Fe})$ | $\rho(\text{O})$ | $\rho(\text{S})$ | $\rho(\text{porphyrin})$ |
|---------------|-------------------|------------------|------------------|--------------------------|
| <b>0</b>      | 1.11818           | 0.83633          | 0.32575          | 0.69981                  |
| <b>200</b>    | 1.12532           | 0.82258          | 0.38369          | 0.64593                  |
| <b>400</b>    | 1.13135           | 0.81873          | 0.39784          | 0.62735                  |
| <b>600</b>    | 1.1238            | 0.82527          | 0.37681          | 0.65101                  |
| <b>800</b>    | 1.13335           | 0.81949          | 0.38451          | 0.63862                  |
| <b>1000</b>   | 1.16801           | 0.77827          | 0.37614          | 0.65434                  |
| <b>1200</b>   | 1.13456           | 0.81369          | 0.36371          | 0.66514                  |
| <b>1400</b>   | 1.119             | 0.83498          | 0.35165          | 0.67238                  |
| <b>1600</b>   | 1.13065           | 0.81642          | 0.37684          | 0.65308                  |
| <b>1800</b>   | 1.13659           | 0.80847          | 0.40948          | 0.62041                  |
| <b>2000</b>   | 1.13715           | 0.81063          | 0.39852          | 0.63054                  |
| <b>2200</b>   | 1.12222           | 0.82573          | 0.35521          | 0.6753                   |
| <b>2400</b>   | 1.13741           | 0.80965          | 0.41692          | 0.61088                  |
| <b>2600</b>   | 1.12736           | 0.81839          | 0.38225          | 0.64879                  |
| <b>2800</b>   | 1.13656           | 0.81006          | 0.35444          | 0.67711                  |
| <b>3000</b>   | 1.16476           | 0.77158          | 0.43838          | 0.59917                  |
| <b>3200</b>   | 1.18932           | 0.7533           | 0.38255          | 0.65132                  |
| <b>3400</b>   | 1.17703           | 0.75624          | 0.43243          | 0.60721                  |
| <b>3600</b>   | 1.15619           | 0.78812          | 0.35786          | 0.67638                  |
| <b>3800</b>   | 1.15935           | 0.78197          | 0.40577          | 0.62819                  |
| <b>4000</b>   | 1.17009           | 0.7699           | 0.3868           | 0.65008                  |
| <b>4200</b>   | 1.17955           | 0.75699          | 0.4223           | 0.61543                  |
| <b>4400</b>   | 1.19174           | 0.73845          | 0.46729          | 0.57456                  |
| <b>4600</b>   | 1.20069           | 0.73181          | 0.46854          | 0.57205                  |
| <b>4800</b>   | 1.17422           | 0.77147          | 0.3702           | 0.66183                  |
| <b>5000</b>   | 1.18635           | 0.75509          | 0.41889          | 0.6145                   |



Table S16 Mulliken spin densities for individual fragments in QM/MM optimized snapshots of Compound I taken from the **2D6\_dex** MD simulation.

| Snapshot [ps] | $\rho(\text{Fe})$ | $\rho(\text{O})$ | $\rho(\text{S})$ | $\rho(\text{porphyrin})$ |
|---------------|-------------------|------------------|------------------|--------------------------|
| <b>0</b>      | 1.18094           | 0.76855          | 0.31245          | 0.71599                  |
| <b>200</b>    | 1.13824           | 0.81286          | 0.33646          | 0.68415                  |
| <b>400</b>    | 1.1429            | 0.8032           | 0.30722          | 0.71807                  |
| <b>600</b>    | 1.12692           | 0.8289           | 0.34525          | 0.67712                  |
| <b>800</b>    | 1.12204           | 0.83079          | 0.32249          | 0.70369                  |
| <b>1000</b>   | 1.12698           | 0.82572          | 0.33975          | 0.68587                  |
| <b>1200</b>   | 1.14238           | 0.80802          | 0.44811          | 0.57479                  |
| <b>1400</b>   | 1.12532           | 0.82209          | 0.36722          | 0.66182                  |
| <b>1600</b>   | 1.12195           | 0.82861          | 0.36436          | 0.66154                  |
| <b>1800</b>   | 1.13036           | 0.82146          | 0.33331          | 0.69361                  |
| <b>2000</b>   | 1.13359           | 0.82046          | 0.37346          | 0.64907                  |
| <b>2200</b>   | 1.12245           | 0.82569          | 0.32972          | 0.69863                  |
| <b>2400</b>   | 1.12839           | 0.82149          | 0.37749          | 0.64746                  |
| <b>2600</b>   | 1.1245            | 0.82665          | 0.36158          | 0.66302                  |
| <b>2800</b>   | 1.11987           | 0.82826          | 0.37331          | 0.65385                  |
| <b>3000</b>   | 1.15505           | 0.782            | 0.46458          | 0.56876                  |
| <b>3200</b>   | 1.13102           | 0.81813          | 0.34826          | 0.68142                  |
| <b>3400</b>   | 1.14505           | 0.7987           | 0.42114          | 0.60894                  |
| <b>3600</b>   | 1.15107           | 0.79167          | 0.45014          | 0.5786                   |
| <b>3800</b>   | 1.14946           | 0.79549          | 0.41051          | 0.621                    |
| <b>4000</b>   | 1.14064           | 0.80577          | 0.34421          | 0.68928                  |
| <b>4200</b>   | 1.1626            | 0.7811           | 0.42216          | 0.60647                  |
| <b>4400</b>   | 1.15052           | 0.79186          | 0.35232          | 0.59676                  |
| <b>4600</b>   | 1.14267           | 0.80024          | 0.43485          | 0.6775                   |
| <b>4800</b>   | 1.14976           | 0.79429          | 0.36963          | 0.66276                  |
| <b>5000</b>   | 1.14267           | 0.80024          | 0.35312          | 0.6775                   |

Table S17 Mulliken spin densities for individual fragments in QM/MM optimized snapshots of Compound I taken from the **3A4\_apo** MD simulation.

| Snapshot [ps] | $\rho(\text{Fe})$ | $\rho(\text{O})$ | $\rho(\text{S})$ | $\rho(\text{porphyrin})$ |
|---------------|-------------------|------------------|------------------|--------------------------|
| <b>0</b>      | 1.14961           | 0.80345          | 0.41994          | 0.60257                  |
| <b>200</b>    | 1.15923           | 0.78353          | 0.59377          | 0.42889                  |
| <b>400</b>    | 1.15082           | 0.80172          | 0.41374          | 0.60846                  |
| <b>600</b>    | 1.15442           | 0.79271          | 0.45973          | 0.56563                  |
| <b>800</b>    | 1.16941           | 0.77449          | 0.44058          | 0.58812                  |
| <b>1000</b>   | 1.15707           | 0.78885          | 0.45494          | 0.57244                  |
| <b>1200</b>   | 1.1731            | 0.77019          | 0.49435          | 0.53454                  |
| <b>1400</b>   | 1.1694            | 0.77427          | 0.55137          | 0.47215                  |
| <b>1600</b>   | 1.17799           | 0.76991          | 0.42118          | 0.60511                  |
| <b>1800</b>   | 1.17909           | 0.76843          | 0.46633          | 0.55871                  |
| <b>2000</b>   | 1.14869           | 0.79432          | 0.45038          | 0.57984                  |
| <b>2200</b>   | 1.17317           | 0.77116          | 0.45014          | 0.57872                  |
| <b>2400</b>   | 1.16314           | 0.7795           | 0.50505          | 0.52133                  |
| <b>2600</b>   | 1.14249           | 0.80244          | 0.49577          | 0.52885                  |
| <b>2800</b>   | 1.24724           | 0.68696          | 0.52595          | 0.50963                  |
| <b>3000</b>   | 1.17028           | 0.77374          | 0.46172          | 0.56639                  |
| <b>3200</b>   | 1.18593           | 0.75669          | 0.51115          | 0.51525                  |
| <b>3400</b>   | 1.13653           | 0.80868          | 0.50088          | 0.52365                  |
| <b>3600</b>   | 1.19545           | 0.74781          | 0.5241           | 0.50252                  |
| <b>3800</b>   | 1.16863           | 0.77846          | 0.44766          | 0.57801                  |
| <b>4000</b>   | 1.13985           | 0.80624          | 0.45942          | 0.56704                  |
| <b>4200</b>   | 1.13355           | 0.81936          | 0.4289           | 0.59157                  |
| <b>4400</b>   | 1.14236           | 0.80089          | 0.44181          | 0.58933                  |
| <b>4600</b>   | 1.16568           | 0.78473          | 0.41218          | 0.61216                  |
| <b>4800</b>   | 1.15211           | 0.7966           | 0.42974          | 0.59572                  |
| <b>5000</b>   | 1.14072           | 0.81377          | 0.41096          | 0.60962                  |

Table S18 Mulliken spin densities for individual fragments in QM/MM optimized snapshots of Compound I taken from the **3A4\_dex** MD simulation.

| Snapshot [ps] | $\rho(\text{Fe})$ | $\rho(\text{O})$ | $\rho(\text{S})$ | $\rho(\text{porphyrin})$ |
|---------------|-------------------|------------------|------------------|--------------------------|
| <b>0</b>      | 1.14629           | 0.80234          | 0.46285          | 0.55982                  |
| <b>200</b>    | 1.15663           | 0.78972          | 0.50919          | 0.51457                  |
| <b>400</b>    | 1.15637           | 0.78678          | 0.48523          | 0.54402                  |
| <b>600</b>    | 1.15025           | 0.79751          | 0.54301          | 0.47794                  |
| <b>800</b>    | 1.139             | 0.80457          | 0.54134          | 0.48434                  |
| <b>1000</b>   | 1.15435           | 0.79282          | 0.54504          | 0.47613                  |
| <b>1200</b>   | 1.17228           | 0.77648          | 0.46697          | 0.55664                  |
| <b>1400</b>   | 1.11631           | 0.83044          | 0.49163          | 0.53297                  |
| <b>1600</b>   | 1.09405           | 0.85622          | 0.47047          | 0.55122                  |
| <b>1800</b>   | 1.13043           | 0.81381          | 0.45957          | 0.57065                  |
| <b>2000</b>   | 1.14606           | 0.79941          | 0.50309          | 0.52131                  |
| <b>2200</b>   | 1.18543           | 0.76362          | 0.43834          | 0.58721                  |
| <b>2400</b>   | 1.23228           | 0.71364          | 0.31938          | 0.71536                  |
| <b>2600</b>   | 1.11938           | 0.83062          | 0.39835          | 0.62674                  |
| <b>2800</b>   | 1.12857           | 0.82441          | 0.35617          | 0.66875                  |
| <b>3000</b>   | 1.16657           | 0.77731          | 0.47053          | 0.55689                  |
| <b>3200</b>   | 1.21545           | 0.72995          | 0.34127          | 0.69327                  |
| <b>3400</b>   | 1.12094           | 0.82645          | 0.42873          | 0.59826                  |
| <b>3600</b>   | 1.16336           | 0.78437          | 0.38109          | 0.64729                  |
| <b>3800</b>   | 1.13312           | 0.81414          | 0.37475          | 0.65589                  |
| <b>4000</b>   | 1.13503           | 0.81311          | 0.39872          | 0.62857                  |
| <b>4200</b>   | 1.16655           | 0.77758          | 0.44805          | 0.58048                  |
| <b>4400</b>   | 1.12315           | 0.82725          | 0.41642          | 0.60811                  |
| <b>4600</b>   | 1.17109           | 0.77307          | 0.43748          | 0.59229                  |
| <b>4800</b>   | 1.20377           | 0.73684          | 0.40737          | 0.62806                  |
| <b>5000</b>   | 1.19012           | 0.75405          | 0.38914          | 0.64435                  |

Table S19 Mulliken spin densities for individual fragments in QM/MM optimized snapshots of Compound I taken from the **P450<sub>cam</sub>-apo** MD simulation.

| Snapshot [ps] | $\rho(\text{Fe})$ | $\rho(\text{O})$ | $\rho(\text{S})$ | $\rho(\text{porphyrin})$ |
|---------------|-------------------|------------------|------------------|--------------------------|
| <b>0</b>      | 1.15479           | 0.79202          | 0.31235          | 0.72117                  |
| <b>200</b>    | 1.15797           | 0.7865           | 0.35496          | 0.67892                  |
| <b>400</b>    | 1.11078           | 0.84029          | 0.24124          | 0.79297                  |
| <b>600</b>    | 1.11142           | 0.83858          | 0.30587          | 0.72622                  |
| <b>800</b>    | 1.13104           | 0.81932          | 0.32498          | 0.70819                  |
| <b>1000</b>   | 1.14568           | 0.79552          | 0.41482          | 0.6202                   |
| <b>1200</b>   | 1.17315           | 0.77169          | 0.26007          | 0.78213                  |
| <b>1400</b>   | 1.1619            | 0.78473          | 0.33222          | 0.70367                  |
| <b>1600</b>   | 1.11041           | 0.84069          | 0.29488          | 0.73757                  |
| <b>1800</b>   | 1.12151           | 0.82783          | 0.39445          | 0.63453                  |
| <b>2000</b>   | 1.1196            | 0.83433          | 0.24161          | 0.79132                  |
| <b>2200</b>   | 1.13692           | 0.81467          | 0.33717          | 0.694                    |
| <b>2400</b>   | 1.1265            | 0.81986          | 0.32644          | 0.70967                  |
| <b>2600</b>   | 1.1701            | 0.77692          | 0.33465          | 0.69906                  |
| <b>2800</b>   | 1.23461           | 0.70194          | 0.39419          | 0.64737                  |
| <b>3000</b>   | 1.21627           | 0.73001          | 0.29922          | 0.73957                  |
| <b>3200</b>   | 1.11918           | 0.82888          | 0.34686          | 0.68427                  |
| <b>3400</b>   | 1.18622           | 0.75767          | 0.34164          | 0.69525                  |
| <b>3600</b>   | 1.1252            | 0.82213          | 0.32784          | 0.70648                  |
| <b>3800</b>   | 1.14088           | 0.79952          | 0.4472           | 0.58725                  |
| <b>4000</b>   | 1.23782           | 0.70234          | 0.36271          | 0.67709                  |
| <b>4200</b>   | 1.18776           | 0.74749          | 0.46117          | 0.57882                  |
| <b>4400</b>   | 1.12786           | 0.81909          | 0.36274          | 0.67072                  |
| <b>4600</b>   | 1.13731           | 0.81019          | 0.36497          | 0.66806                  |
| <b>4800</b>   | 1.14328           | 0.80213          | 0.33224          | 0.70332                  |
| <b>5000</b>   | 1.12557           | 0.82679          | 0.32016          | 0.71095                  |

Table S20 Mulliken spin densities for individual fragments in QM/MM optimized snapshots of Compound I taken from the **P450<sub>cam</sub>-prop** MD simulation.

| Snapshot [ps] | $\rho(\text{Fe})$ | $\rho(\text{O})$ | $\rho(\text{S})$ | $\rho(\text{porphyrin})$ |
|---------------|-------------------|------------------|------------------|--------------------------|
| <b>0</b>      | 1.14589           | 0.80186          | 0.27685          | 0.75303                  |
| <b>200</b>    | 1.14144           | 0.80471          | 0.30175          | 0.72765                  |
| <b>400</b>    | 1.11803           | 0.83006          | 0.17405          | 0.84453                  |
| <b>600</b>    | 1.14078           | 0.8076           | 0.25815          | 0.77252                  |
| <b>800</b>    | 1.13412           | 0.81603          | 0.26217          | 0.76571                  |
| <b>1000</b>   | 1.12172           | 0.82425          | 0.25761          | 0.77202                  |
| <b>1200</b>   | 1.14878           | 0.79685          | 0.21995          | 0.79103                  |
| <b>1400</b>   | 1.15751           | 0.7841           | 0.22541          | 0.80455                  |
| <b>1600</b>   | 1.13989           | 0.8035           | 0.21677          | 0.80803                  |
| <b>1800</b>   | 1.13235           | 0.81332          | 0.19768          | 0.84317                  |
| <b>2000</b>   | 1.16662           | 0.77629          | 0.3421           | 0.69484                  |
| <b>2200</b>   | 1.1449            | 0.79791          | 0.25061          | 0.72981                  |
| <b>2400</b>   | 1.11569           | 0.83082          | 0.33637          | 0.68886                  |
| <b>2600</b>   | 1.1004            | 0.85295          | 0.37857          | 0.64117                  |
| <b>2800</b>   | 1.12464           | 0.82411          | 0.22867          | 0.80452                  |
| <b>3000</b>   | 1.13759           | 0.80754          | 0.25551          | 0.77955                  |
| <b>3200</b>   | 1.18447           | 0.75801          | 0.2316           | 0.80394                  |
| <b>3400</b>   | 1.133             | 0.81385          | 0.27753          | 0.75574                  |
| <b>3600</b>   | 1.18305           | 0.75691          | 0.35443          | 0.68141                  |
| <b>3800</b>   | 1.14215           | 0.80302          | 0.27325          | 0.76297                  |
| <b>4000</b>   | 1.13588           | 0.80618          | 0.27444          | 0.75875                  |
| <b>4200</b>   | 1.17712           | 0.75755          | 0.46636          | 0.56387                  |
| <b>4400</b>   | 1.12129           | 0.82299          | 0.30159          | 0.72203                  |
| <b>4600</b>   | 1.17283           | 0.77356          | 0.25203          | 0.78671                  |
| <b>4800</b>   | 1.12897           | 0.81789          | 0.31174          | 0.72061                  |
| <b>5000</b>   | 1.13741           | 0.81112          | 0.24013          | 0.79644                  |

**Part D Mulliken charges for QM/MM optimized snapshots of Compound I**

Table S21 Mulliken charges for individual fragments in QM/MM optimized snapshots of Compound I taken from the **2C9\_apo** MD simulation.

| Snapshot [ps] | Q(Fe)   | Q(O)     | Q(S)     | Q(porphyrin) |
|---------------|---------|----------|----------|--------------|
| 0             | 0.58543 | -0.4349  | -0.17025 | 0.11138      |
| 200           | 0.5543  | -0.44139 | -0.11942 | 0.09522      |
| 400           | 0.49001 | -0.43969 | -0.12844 | 0.17635      |
| 600           | 0.50247 | -0.44415 | -0.10526 | 0.12572      |
| 800           | 0.56028 | -0.44284 | -0.16243 | 0.13491      |
| 1000          | 0.5447  | -0.46286 | -0.11467 | 0.10642      |
| 1200          | 0.59781 | -0.45244 | -0.17255 | 0.09952      |
| 1400          | 0.52238 | -0.44095 | -0.14961 | 0.15503      |
| 1600          | 0.56108 | -0.43368 | -0.16944 | 0.12491      |
| 1800          | 0.53429 | -0.43985 | -0.14446 | 0.14103      |
| 2000          | 0.53886 | -0.44472 | -0.13294 | 0.13397      |
| 2200          | 0.5142  | -0.44162 | -0.17303 | 0.19097      |
| 2400          | 0.49207 | -0.51964 | -0.15131 | 0.26474      |
| 2600          | 0.54894 | -0.50886 | -0.1077  | 0.14177      |
| 2800          | 0.54741 | -0.44048 | -0.13168 | 0.11908      |
| 3000          | 0.53036 | -0.45274 | -0.16761 | 0.18254      |
| 3200          | 0.55265 | -0.43597 | -0.20268 | 0.18119      |
| 3400          | 0.53143 | -0.43775 | -0.1384  | 0.13601      |
| 3600          | 0.53172 | -0.45609 | -0.15474 | 0.16282      |
| 3800          | 0.52813 | -0.45255 | -0.13027 | 0.13653      |
| 4000          | 0.5343  | -0.44107 | -0.19449 | 0.2082       |
| 4200          | 0.56178 | -0.44082 | -0.15097 | 0.11095      |
| 4400          | 0.57582 | -0.4414  | -0.0785  | 0.02364      |
| 4600          | 0.53501 | -0.44152 | -0.09301 | 0.08189      |
| 4800          | 0.59129 | -0.4462  | -0.14957 | 0.07576      |
| 5000          | 0.56609 | -0.45443 | -0.10042 | 0.05843      |

Table S22 Mulliken charges for individual fragments in QM/MM optimized snapshots of Compound I taken from the **2C9\_prox** MD simulation.

| Snapshot [ps] | Q(Fe)   | Q(O)     | Q(S)     | Q(porphyrin) |
|---------------|---------|----------|----------|--------------|
| <b>0</b>      | 0.47332 | -0.39046 | -0.11996 | 0.09064      |
| <b>200</b>    | 0.48429 | -0.39371 | -0.06207 | 0.01358      |
| <b>400</b>    | 0.48447 | -0.44736 | -0.11432 | 0.11271      |
| <b>600</b>    | 0.48847 | -0.4537  | -0.14324 | 0.15422      |
| <b>800</b>    | 0.4618  | -0.46546 | -0.10123 | 0.16942      |
| <b>1000</b>   | 0.50699 | -0.46439 | -0.11409 | 0.1021       |
| <b>1200</b>   | 0.49559 | -0.46373 | -0.06894 | 0.08316      |
| <b>1400</b>   | 0.49471 | -0.47987 | -0.08442 | 0.10692      |
| <b>1600</b>   | 0.50556 | -0.47019 | -0.09723 | 0.09207      |
| <b>1800</b>   | 0.4954  | -0.4778  | -0.07981 | 0.10138      |
| <b>2000</b>   | 0.52327 | -0.48438 | -0.15729 | 0.16799      |
| <b>2200</b>   | 0.48655 | -0.47177 | -0.1309  | 0.15655      |
| <b>2400</b>   | 0.46974 | -0.48477 | -0.11396 | 0.18119      |
| <b>2600</b>   | 0.48245 | -0.46442 | -0.11333 | 0.13973      |
| <b>2800</b>   | 0.53329 | -0.39661 | -0.12043 | 0.02937      |
| <b>3000</b>   | 0.51876 | -0.39701 | -0.11451 | 0.03136      |
| <b>3200</b>   | 0.48877 | -0.41577 | -0.00131 | -0.0078      |
| <b>3400</b>   | 0.51267 | -0.42371 | -0.01824 | -0.01163     |
| <b>3600</b>   | 0.49788 | -0.41465 | -0.00924 | -0.01147     |
| <b>3800</b>   | 0.54126 | -0.42431 | -0.03046 | -0.02821     |
| <b>4000</b>   | 0.61571 | -0.41121 | 0.0062   | -0.14134     |
| <b>4200</b>   | 0.60515 | -0.40359 | -0.02697 | -0.11477     |
| <b>4400</b>   | 0.57431 | -0.41783 | -0.04124 | -0.05654     |
| <b>4600</b>   | 0.59833 | -0.39873 | -0.04772 | -0.07676     |
| <b>4800</b>   | 0.66867 | -0.42996 | -0.01807 | -0.16312     |
| <b>5000</b>   | 0.50624 | -0.40756 | -0.09731 | 0.06727      |

Table S23 Mulliken charges for individual fragments in QM/MM optimized snapshots of Compound I taken from the **2C9\_dist** MD simulation.

| Snapshot [ps] | Q(Fe)   | Q(O)     | Q(S)     | Q(porphyrin) |
|---------------|---------|----------|----------|--------------|
| <b>0</b>      | 0.48227 | -0.4511  | -0.16032 | 0.18155      |
| <b>200</b>    | 0.49407 | -0.4445  | -0.13931 | 0.15206      |
| <b>400</b>    | 0.48956 | -0.43174 | -0.08548 | 0.0731       |
| <b>600</b>    | 0.48584 | -0.37944 | -0.13798 | 0.08653      |
| <b>800</b>    | 0.5076  | -0.45954 | -0.08581 | 0.07863      |
| <b>1000</b>   | 0.4981  | -0.44805 | -0.07379 | 0.06487      |
| <b>1200</b>   | 0.4755  | -0.45101 | -0.06098 | 0.08177      |
| <b>1400</b>   | 0.49389 | -0.4455  | -0.09169 | 0.10365      |
| <b>1600</b>   | 0.51452 | -0.44402 | -0.13656 | 0.10866      |
| <b>1800</b>   | 0.47193 | -0.44147 | -0.10268 | 0.12424      |
| <b>2000</b>   | 0.51658 | -0.4516  | -0.10784 | 0.08276      |
| <b>2200</b>   | 0.50993 | -0.47439 | -0.10925 | 0.12152      |
| <b>2400</b>   | 0.50931 | -0.46216 | -0.10646 | 0.10371      |
| <b>2600</b>   | 0.53377 | -0.43974 | -0.09373 | 0.03289      |
| <b>2800</b>   | 0.51629 | -0.43081 | -0.09606 | 0.05797      |
| <b>3000</b>   | 0.55233 | -0.44639 | -0.07958 | 0.01879      |
| <b>3200</b>   | 0.52678 | -0.43794 | -0.11429 | 0.07565      |
| <b>3400</b>   | 0.54484 | -0.44165 | -0.1261  | 0.07908      |
| <b>3600</b>   | 0.52211 | -0.45047 | -0.07896 | 0.05244      |
| <b>3800</b>   | 0.50584 | -0.45596 | -0.05108 | 0.05177      |
| <b>4000</b>   | 0.53221 | -0.45871 | -0.07005 | 0.04574      |
| <b>4200</b>   | 0.50594 | -0.44114 | -0.09428 | 0.08772      |
| <b>4400</b>   | 0.51659 | -0.5127  | -0.04447 | 0.07981      |
| <b>4600</b>   | 0.49662 | -0.44502 | -0.0904  | 0.08627      |
| <b>4800</b>   | 0.48552 | -0.45346 | -0.13942 | 0.16598      |
| <b>5000</b>   | 0.53863 | -0.44635 | -0.11565 | 0.07672      |



Table S24 Mulliken charges for individual fragments in QM/MM optimized snapshots of Compound I taken from the **2C9\_2warf** MD simulation.

| Snapshot [ps] | Q(Fe)   | Q(O)     | Q(S)     | Q(porphyrin) |
|---------------|---------|----------|----------|--------------|
| <b>0</b>      | 0.49698 | -0.36264 | -0.16353 | 0.08608      |
| <b>200</b>    | 0.51371 | -0.39445 | -0.16514 | 0.09981      |
| <b>400</b>    | 0.47597 | -0.38049 | -0.16806 | 0.14061      |
| <b>600</b>    | 0.49304 | -0.37951 | -0.16064 | 0.09597      |
| <b>800</b>    | 0.51056 | -0.3936  | -0.1287  | 0.05461      |
| <b>1000</b>   | 0.50117 | -0.39203 | -0.16363 | 0.10734      |
| <b>1200</b>   | 0.52261 | -0.40215 | -0.17108 | 0.10461      |
| <b>1400</b>   | 0.49834 | -0.40324 | -0.1302  | 0.07047      |
| <b>1600</b>   | 0.49218 | -0.40888 | -0.11997 | 0.08956      |
| <b>1800</b>   | 0.48016 | -0.38185 | -0.13663 | 0.07671      |
| <b>2000</b>   | 0.49988 | -0.41094 | -0.15373 | 0.12814      |
| <b>2200</b>   | 0.48638 | -0.39665 | -0.17992 | 0.13707      |
| <b>2400</b>   | 0.49088 | -0.40288 | -0.15062 | 0.11576      |
| <b>2600</b>   | 0.46076 | -0.37741 | -0.16838 | 0.14634      |
| <b>2800</b>   | 0.49399 | -0.38383 | -0.11563 | 0.05119      |
| <b>3000</b>   | 0.50095 | -0.38181 | -0.10773 | 0.02981      |
| <b>3200</b>   | 0.47995 | -0.39868 | -0.19146 | 0.17227      |
| <b>3400</b>   | 0.47501 | -0.39076 | -0.15592 | 0.11375      |
| <b>3600</b>   | 0.4948  | -0.39731 | -0.16794 | 0.1149       |
| <b>3800</b>   | 0.47114 | -0.40186 | -0.13468 | 0.11228      |
| <b>4000</b>   | 0.55451 | -0.38575 | -0.19841 | 0.07286      |
| <b>4200</b>   | 0.47108 | -0.3865  | -0.14794 | 0.1099       |
| <b>4400</b>   | 0.47506 | -0.46148 | -0.1627  | 0.18678      |
| <b>4600</b>   | 0.48824 | -0.43681 | -0.11665 | 0.1095       |
| <b>4800</b>   | 0.48581 | -0.4512  | -0.09298 | 0.09501      |
| <b>5000</b>   | 0.45853 | -0.46348 | -0.14488 | 0.20631      |

Table S25 Mulliken charges for individual fragments in QM/MM optimized snapshots of Compound I taken from the **2D6\_apo** MD simulation.

| Snapshot [ps] | Q(Fe)   | Q(O)     | Q(S)     | Q(porphyrin) |
|---------------|---------|----------|----------|--------------|
| <b>0</b>      | 0.47352 | -0.39067 | -0.14899 | 0.16648      |
| <b>200</b>    | 0.51394 | -0.3871  | -0.15731 | 0.12998      |
| <b>400</b>    | 0.49673 | -0.39559 | -0.12145 | 0.12148      |
| <b>600</b>    | 0.50851 | -0.3888  | -0.15999 | 0.14273      |
| <b>800</b>    | 0.48874 | -0.39761 | -0.11979 | 0.13086      |
| <b>1000</b>   | 0.50744 | -0.46191 | -0.12387 | 0.17717      |
| <b>1200</b>   | 0.50533 | -0.39888 | -0.16603 | 0.16548      |
| <b>1400</b>   | 0.49872 | -0.38888 | -0.14193 | 0.14587      |
| <b>1600</b>   | 0.52852 | -0.3809  | -0.18213 | 0.14737      |
| <b>1800</b>   | 0.5416  | -0.38417 | -0.19609 | 0.12765      |
| <b>2000</b>   | 0.53314 | -0.39197 | -0.1737  | 0.13613      |
| <b>2200</b>   | 0.52395 | -0.38248 | -0.19738 | 0.16608      |
| <b>2400</b>   | 0.51502 | -0.39172 | -0.15087 | 0.11393      |
| <b>2600</b>   | 0.5267  | -0.38824 | -0.19563 | 0.14381      |
| <b>2800</b>   | 0.52808 | -0.39486 | -0.20263 | 0.17417      |
| <b>3000</b>   | 0.56289 | -0.43099 | -0.17999 | 0.13755      |
| <b>3200</b>   | 0.531   | -0.46384 | -0.16003 | 0.18805      |
| <b>3400</b>   | 0.55975 | -0.4852  | -0.13244 | 0.15744      |
| <b>3600</b>   | 0.55377 | -0.47296 | -0.17661 | 0.20282      |
| <b>3800</b>   | 0.55582 | -0.46304 | -0.16568 | 0.15664      |
| <b>4000</b>   | 0.56263 | -0.4603  | -0.17574 | 0.17542      |
| <b>4200</b>   | 0.5576  | -0.46678 | -0.14353 | 0.1494       |
| <b>4400</b>   | 0.60607 | -0.48404 | -0.17439 | 0.14064      |
| <b>4600</b>   | 0.57828 | -0.48619 | -0.13402 | 0.13233      |
| <b>4800</b>   | 0.53206 | -0.45467 | -0.15118 | 0.1813       |
| <b>5000</b>   | 0.52536 | -0.46591 | -0.12591 | 0.1478       |

Table S26 Mulliken charges for individual fragments in QM/MM optimized snapshots of Compound I taken from the **2D6\_dex** MD simulation.

| Snapshot [ps] | Q(Fe)   | Q(O)     | Q(S)     | Q(porphyrin) |
|---------------|---------|----------|----------|--------------|
| <b>0</b>      | 0.4477  | -0.4419  | -0.14312 | 0.23641      |
| <b>200</b>    | 0.45991 | -0.41121 | -0.11841 | 0.16611      |
| <b>400</b>    | 0.47704 | -0.4177  | -0.16672 | 0.20502      |
| <b>600</b>    | 0.47518 | -0.39344 | -0.16903 | 0.17313      |
| <b>800</b>    | 0.47146 | -0.39421 | -0.19163 | 0.20247      |
| <b>1000</b>   | 0.4828  | -0.39623 | -0.17932 | 0.18436      |
| <b>1200</b>   | 0.48791 | -0.40168 | -0.10921 | 0.08888      |
| <b>1400</b>   | 0.48198 | -0.39911 | -0.17033 | 0.1659       |
| <b>1600</b>   | 0.46152 | -0.39668 | -0.14514 | 0.16396      |
| <b>1800</b>   | 0.45735 | -0.40428 | -0.1662  | 0.19708      |
| <b>2000</b>   | 0.46937 | -0.3962  | -0.17624 | 0.16508      |
| <b>2200</b>   | 0.46531 | -0.39936 | -0.1901  | 0.19912      |
| <b>2400</b>   | 0.47899 | -0.39533 | -0.15492 | 0.16545      |
| <b>2600</b>   | 0.48267 | -0.39491 | -0.17534 | 0.15675      |
| <b>2800</b>   | 0.47039 | -0.39421 | -0.14988 | 0.15341      |
| <b>3000</b>   | 0.51132 | -0.41551 | -0.1207  | 0.09822      |
| <b>3200</b>   | 0.49169 | -0.39183 | -0.19658 | 0.17305      |
| <b>3400</b>   | 0.4917  | -0.4088  | -0.14439 | 0.12511      |
| <b>3600</b>   | 0.47836 | -0.41783 | -0.0927  | 0.09352      |
| <b>3800</b>   | 0.47926 | -0.41289 | -0.14211 | 0.14517      |
| <b>4000</b>   | 0.46075 | -0.41363 | -0.15759 | 0.19143      |
| <b>4200</b>   | 0.50766 | -0.42428 | -0.14053 | 0.12124      |
| <b>4400</b>   | 0.47395 | -0.41874 | -0.16856 | 0.17449      |
| <b>4600</b>   | 0.48769 | -0.41434 | -0.1178  | 0.12548      |
| <b>4800</b>   | 0.49456 | -0.41605 | -0.17202 | 0.16878      |
| <b>5000</b>   | 0.47741 | -0.41944 | -0.1611  | 0.16943      |

Table S27 Mulliken charges for individual fragments in QM/MM optimized snapshots of Compound I taken from the **3A4\_apo** MD simulation.

| Snapshot [ps] | Q(Fe)   | Q(O)     | Q(S)     | Q(porphyrin) |
|---------------|---------|----------|----------|--------------|
| <b>0</b>      | 0.49002 | -0.4487  | -0.06554 | 0.08565      |
| <b>200</b>    | 0.53828 | -0.44926 | -0.00876 | -0.04949     |
| <b>400</b>    | 0.4807  | -0.4667  | -0.06399 | 0.10463      |
| <b>600</b>    | 0.51438 | -0.42254 | -0.09474 | 0.06909      |
| <b>800</b>    | 0.52464 | -0.45961 | -0.10847 | 0.1096       |
| <b>1000</b>   | 0.50948 | -0.44358 | -0.07872 | 0.07663      |
| <b>1200</b>   | 0.53352 | -0.45889 | -0.07603 | 0.06482      |
| <b>1400</b>   | 0.52061 | -0.45368 | -0.02219 | 0.00123      |
| <b>1600</b>   | 0.48924 | -0.44152 | -0.08971 | 0.10955      |
| <b>1800</b>   | 0.50774 | -0.44797 | -0.07303 | 0.07675      |
| <b>2000</b>   | 0.52925 | -0.43568 | -0.11029 | 0.07669      |
| <b>2200</b>   | 0.50859 | -0.4527  | -0.08416 | 0.08905      |
| <b>2400</b>   | 0.52665 | -0.44318 | -0.05719 | 0.03558      |
| <b>2600</b>   | 0.51276 | -0.44349 | -0.04881 | 0.02816      |
| <b>2800</b>   | 0.50999 | -0.50712 | -0.02955 | 0.08444      |
| <b>3000</b>   | 0.51965 | -0.43892 | -0.08521 | 0.06884      |
| <b>3200</b>   | 0.51107 | -0.44863 | -0.05122 | 0.03887      |
| <b>3400</b>   | 0.52462 | -0.43593 | -0.05529 | 0.02537      |
| <b>3600</b>   | 0.53093 | -0.45199 | -0.04333 | 0.03932      |
| <b>3800</b>   | 0.51213 | -0.44362 | -0.09008 | 0.08322      |
| <b>4000</b>   | 0.5214  | -0.41888 | -0.09558 | 0.05656      |
| <b>4200</b>   | 0.49984 | -0.44154 | -0.08567 | 0.07587      |
| <b>4400</b>   | 0.51784 | -0.44476 | -0.10326 | 0.08989      |
| <b>4600</b>   | 0.49159 | -0.44258 | -0.09375 | 0.11026      |
| <b>4800</b>   | 0.51231 | -0.45187 | -0.08371 | 0.08932      |
| <b>5000</b>   | 0.48293 | -0.44975 | -0.05349 | 0.09647      |

Table S28 Mulliken charges for individual fragments in QM/MM optimized snapshots of Compound I taken from the **3A4\_dex** MD simulation.

| Snapshot [ps] | Q(Fe)   | Q(O)     | Q(S)     | Q(porphyrin) |
|---------------|---------|----------|----------|--------------|
| <b>0</b>      | 0.50219 | -0.45127 | -0.05418 | 0.05825      |
| <b>200</b>    | 0.52298 | -0.44378 | -0.05296 | 0.02409      |
| <b>400</b>    | 0.53728 | -0.45313 | -0.09296 | 0.06029      |
| <b>600</b>    | 0.51604 | -0.44955 | -0.02133 | -0.00798     |
| <b>800</b>    | 0.52887 | -0.43827 | -0.05227 | -0.00639     |
| <b>1000</b>   | 0.53069 | -0.44533 | -0.03852 | -0.00723     |
| <b>1200</b>   | 0.51452 | -0.44814 | -0.08233 | 0.06893      |
| <b>1400</b>   | 0.53341 | -0.414   | -0.08543 | 0.01581      |
| <b>1600</b>   | 0.51249 | -0.39273 | -0.07419 | 0.00159      |
| <b>1800</b>   | 0.54103 | -0.43234 | -0.10793 | 0.05983      |
| <b>2000</b>   | 0.53467 | -0.43683 | -0.07297 | 0.01913      |
| <b>2200</b>   | 0.48793 | -0.47186 | -0.06317 | 0.09374      |
| <b>2400</b>   | 0.49299 | -0.51581 | -0.13811 | 0.22645      |
| <b>2600</b>   | 0.52405 | -0.43852 | -0.11547 | 0.09044      |
| <b>2800</b>   | 0.49404 | -0.45452 | -0.11535 | 0.1352       |
| <b>3000</b>   | 0.51022 | -0.42955 | -0.09117 | 0.05929      |
| <b>3200</b>   | 0.47083 | -0.51431 | -0.11506 | 0.21694      |
| <b>3400</b>   | 0.51975 | -0.43404 | -0.11288 | 0.07601      |
| <b>3600</b>   | 0.50952 | -0.47844 | -0.12445 | 0.14126      |
| <b>3800</b>   | 0.50549 | -0.45019 | -0.1264  | 0.13094      |
| <b>4000</b>   | 0.5131  | -0.44964 | -0.11089 | 0.10679      |
| <b>4200</b>   | 0.49507 | -0.47994 | -0.04642 | 0.08714      |
| <b>4400</b>   | 0.525   | -0.44163 | -0.10337 | 0.08663      |
| <b>4600</b>   | 0.50984 | -0.47784 | -0.08505 | 0.09773      |
| <b>4800</b>   | 0.49143 | -0.51297 | -0.07315 | 0.14584      |
| <b>5000</b>   | 0.49553 | -0.48451 | -0.13169 | 0.16459      |

Table S29 Mulliken charges for individual fragments in QM/MM optimized snapshots of Compound I taken from the **P450<sub>cam</sub>-apo** MD simulation.

| Snapshot [ps] | Q(Fe)   | Q(O)     | Q(S)     | Q(porphyrin) |
|---------------|---------|----------|----------|--------------|
| <b>0</b>      | 0.52828 | -0.45817 | -0.18372 | 0.2162       |
| <b>200</b>    | 0.52042 | -0.44589 | -0.16132 | 0.17277      |
| <b>400</b>    | 0.5183  | -0.43379 | -0.23685 | 0.24447      |
| <b>600</b>    | 0.5247  | -0.42316 | -0.20889 | 0.19066      |
| <b>800</b>    | 0.53442 | -0.43593 | -0.18535 | 0.18496      |
| <b>1000</b>   | 0.55236 | -0.4431  | -0.1535  | 0.12439      |
| <b>1200</b>   | 0.52741 | -0.45041 | -0.24597 | 0.27689      |
| <b>1400</b>   | 0.54048 | -0.42724 | -0.20258 | 0.19534      |
| <b>1600</b>   | 0.54302 | -0.42377 | -0.21408 | 0.19938      |
| <b>1800</b>   | 0.52856 | -0.42307 | -0.14489 | 0.12249      |
| <b>2000</b>   | 0.51139 | -0.4321  | -0.22498 | 0.24494      |
| <b>2200</b>   | 0.52158 | -0.43794 | -0.17771 | 0.17426      |
| <b>2400</b>   | 0.53756 | -0.42671 | -0.19584 | 0.19238      |
| <b>2600</b>   | 0.51336 | -0.44255 | -0.17777 | 0.19864      |
| <b>2800</b>   | 0.55217 | -0.49644 | -0.16948 | 0.20195      |
| <b>3000</b>   | 0.51146 | -0.4781  | -0.19346 | 0.2575       |
| <b>3200</b>   | 0.54826 | -0.42451 | -0.2009  | 0.16393      |
| <b>3400</b>   | 0.50624 | -0.46762 | -0.16599 | 0.21917      |
| <b>3600</b>   | 0.54941 | -0.4343  | -0.20652 | 0.18964      |
| <b>3800</b>   | 0.58472 | -0.42179 | -0.18346 | 0.10647      |
| <b>4000</b>   | 0.53131 | -0.49622 | -0.17966 | 0.21897      |
| <b>4200</b>   | 0.58627 | -0.43123 | -0.17612 | 0.11485      |
| <b>4400</b>   | 0.55477 | -0.42371 | -0.1794  | 0.15221      |
| <b>4600</b>   | 0.54422 | -0.43099 | -0.17988 | 0.15229      |
| <b>4800</b>   | 0.55551 | -0.42985 | -0.21891 | 0.19185      |
| <b>5000</b>   | 0.50829 | -0.43473 | -0.16943 | 0.18267      |

Table S30 Mulliken charges for individual fragments in QM/MM optimized snapshots of Compound I taken from the **P450<sub>cam</sub>\_prop** MD simulation.

| Snapshot [ps] | Q(Fe)   | Q(O)     | Q(S)     | Q(porphyrin) |
|---------------|---------|----------|----------|--------------|
| 0             | 0.48426 | -0.42561 | -0.22807 | 0.23858      |
| 200           | 0.47991 | -0.42166 | -0.21832 | 0.2146       |
| 400           | 0.48373 | -0.43223 | -0.27344 | 0.29852      |
| 600           | 0.48767 | -0.43336 | -0.23297 | 0.24716      |
| 800           | 0.47328 | -0.43651 | -0.20624 | 0.2358       |
| 1000          | 0.49331 | -0.42158 | -0.24862 | 0.24349      |
| 1200          | 0.50934 | -0.44741 | -0.24427 | 0.25855      |
| 1400          | 0.49873 | -0.45937 | -0.23625 | 0.27983      |
| 1600          | 0.51337 | -0.45074 | -0.27231 | 0.27706      |
| 1800          | 0.50433 | -0.42256 | -0.31258 | 0.29973      |
| 2000          | 0.50862 | -0.439   | -0.17368 | 0.19585      |
| 2200          | 0.5152  | -0.45092 | -0.2072  | 0.19539      |
| 2400          | 0.46374 | -0.41897 | -0.13853 | 0.15653      |
| 2600          | 0.48917 | -0.36474 | -0.1545  | 0.09519      |
| 2800          | 0.49655 | -0.43917 | -0.21531 | 0.26158      |
| 3000          | 0.48502 | -0.4409  | -0.19134 | 0.24881      |
| 3200          | 0.50623 | -0.47596 | -0.19757 | 0.27501      |
| 3400          | 0.49107 | -0.4361  | -0.20009 | 0.21892      |
| 3600          | 0.52381 | -0.4593  | -0.16871 | 0.18681      |
| 3800          | 0.4941  | -0.44212 | -0.17589 | 0.2354       |
| 4000          | 0.50896 | -0.44001 | -0.20854 | 0.22535      |
| 4200          | 0.58208 | -0.48147 | -0.08363 | 0.07782      |
| 4400          | 0.49817 | -0.4015  | -0.17398 | 0.1815       |
| 4600          | 0.46935 | -0.44594 | -0.20203 | 0.28003      |
| 4800          | 0.47621 | -0.44197 | -0.13529 | 0.20123      |
| 5000          | 0.48214 | -0.45039 | -0.18593 | 0.27591      |

**Part E Key bond lengths and hydrogen bond distances**

Table S31 Distances [in Å], between the heme iron and Cys435 sulfur, heme iron and ferryl oxygen, Cys435 sulfur and the backbone nitrogen atoms of Val436, Gly437 and Glu438 in the QM/MM optimized snapshots from the **2C9\_apo** simulation.

| Snapshot [ps] | d(Fe-S) | d(Fe-O) | d(S-Val436) | d(S-Gly437) | d(S-Glu438) |
|---------------|---------|---------|-------------|-------------|-------------|
| <b>0</b>      | 2.77984 | 1.61488 | 3.31776     | 2.32686     | 3.47932     |
| <b>200</b>    | 2.67446 | 1.61826 | 3.39141     | 2.36771     | 3.41419     |
| <b>400</b>    | 2.56206 | 1.62288 | 3.2112      | 2.41874     | 3.42235     |
| <b>600</b>    | 2.57893 | 1.62014 | 3.29596     | 2.3496      | 3.57655     |
| <b>800</b>    | 2.70439 | 1.61817 | 3.19405     | 2.29746     | 3.38096     |
| <b>1000</b>   | 2.70766 | 1.61719 | 3.23435     | 2.26208     | 3.46235     |
| <b>1200</b>   | 2.88243 | 1.61439 | 3.07147     | 2.21397     | 3.61365     |
| <b>1400</b>   | 2.61673 | 1.62312 | 3.12328     | 2.41222     | 3.29346     |
| <b>1600</b>   | 2.72544 | 1.61849 | 3.37019     | 2.39243     | 3.2794      |
| <b>1800</b>   | 2.66767 | 1.61981 | 3.32001     | 2.29854     | 3.45354     |
| <b>2000</b>   | 2.65047 | 1.62104 | 3.18175     | 2.26728     | 3.39207     |
| <b>2200</b>   | 2.61385 | 1.62119 | 3.25106     | 2.26454     | 3.54927     |
| <b>2400</b>   | 2.56638 | 1.6272  | 3.12316     | 2.27817     | 3.43631     |
| <b>2600</b>   | 2.67321 | 1.62236 | 3.29426     | 2.31892     | 3.55777     |
| <b>2800</b>   | 2.65971 | 1.61954 | 3.36428     | 2.32332     | 3.77502     |
| <b>3000</b>   | 2.63418 | 1.61971 | 3.24441     | 2.26553     | 3.41537     |
| <b>3200</b>   | 2.67076 | 1.61687 | 2.78732     | 2.2777      | 3.42221     |
| <b>3400</b>   | 2.62353 | 1.62146 | 3.29985     | 2.3061      | 3.63222     |
| <b>3600</b>   | 2.64818 | 1.62065 | 2.99        | 2.2646      | 3.574       |
| <b>3800</b>   | 2.61668 | 1.6202  | 3.32289     | 2.32301     | 3.33275     |
| <b>4000</b>   | 2.6145  | 1.62266 | 3.23869     | 2.25001     | 3.60284     |
| <b>4200</b>   | 2.71022 | 1.61561 | 3.24027     | 2.25211     | 3.57293     |
| <b>4400</b>   | 2.72864 | 1.61739 | 3.20553     | 2.50124     | 3.93607     |
| <b>4600</b>   | 2.63486 | 1.61818 | 3.58957     | 2.37818     | 3.51961     |
| <b>4800</b>   | 2.81916 | 1.6095  | 3.28931     | 2.28351     | 3.27236     |
| <b>5000</b>   | 2.78146 | 1.61537 | 3.03701     | 2.3617      | 3.7115      |



Table S32 Distances [in Å], between the heme iron and Cys435 sulfur, heme iron and ferryl oxygen, Cys435 sulfur and the backbone nitrogen atoms of Val436, Gly437 and Glu438 in the QM/MM optimized snapshots from the **2C9\_prox** simulation.

| Snapshot [ps] | d(Fe-S) | d(Fe-O) | d(S-Val436) | d(S-Gly437) | d(S-Glu438) |
|---------------|---------|---------|-------------|-------------|-------------|
| <b>0</b>      | 2.62792 | 1.61964 | 3.26053     | 2.46248     | 3.56521     |
| <b>200</b>    | 2.64668 | 1.61814 | 3.19536     | 2.55341     | 3.65963     |
| <b>400</b>    | 2.61001 | 1.61857 | 3.33809     | 2.28099     | 3.46768     |
| <b>600</b>    | 2.62345 | 1.61941 | 3.13009     | 2.26732     | 3.5494      |
| <b>800</b>    | 2.55855 | 1.62595 | 3.32603     | 2.52627     | 3.52832     |
| <b>1000</b>   | 2.61652 | 1.61952 | 3.42603     | 2.336       | 3.24168     |
| <b>1200</b>   | 2.60956 | 1.62058 | 3.17366     | 2.5911      | 3.65928     |
| <b>1400</b>   | 2.57118 | 1.62195 | 3.14763     | 2.34604     | 3.40921     |
| <b>1600</b>   | 2.61572 | 1.61975 | 3.28428     | 2.42006     | 3.38235     |
| <b>1800</b>   | 2.58686 | 1.62045 | 3.2748      | 2.44035     | 3.5874      |
| <b>2000</b>   | 2.61873 | 1.6219  | 3.14318     | 2.40971     | 3.19751     |
| <b>2200</b>   | 2.59962 | 1.6217  | 3.06453     | 2.3124      | 3.86068     |
| <b>2400</b>   | 2.56699 | 1.6225  | 3.36355     | 2.28588     | 3.55914     |
| <b>2600</b>   | 2.6234  | 1.62013 | 3.45146     | 2.38699     | 3.62052     |
| <b>2800</b>   | 2.71616 | 1.61564 | 2.97324     | 2.44718     | 3.66927     |
| <b>3000</b>   | 2.64382 | 1.61538 | 3.134       | 2.27144     | 3.31443     |
| <b>3200</b>   | 2.64067 | 1.61847 | 3.62377     | 4.18154     | 3.06029     |
| <b>3400</b>   | 2.65189 | 1.61911 | 3.38164     | 4.19436     | 3.04256     |
| <b>3600</b>   | 2.623   | 1.62228 | 3.78012     | 4.45076     | 3.12401     |
| <b>3800</b>   | 2.72698 | 1.61594 | 3.4006      | 4.18632     | 3.17671     |
| <b>4000</b>   | 2.88982 | 1.61252 | 3.73696     | 5.08974     | 3.60525     |
| <b>4200</b>   | 2.94193 | 1.61041 | 3.58033     | 4.48109     | 3.18757     |
| <b>4400</b>   | 2.81914 | 1.61386 | 3.59279     | 4.6289      | 3.13005     |
| <b>4600</b>   | 2.90536 | 1.61018 | 3.68846     | 4.5584      | 3.22345     |
| <b>4800</b>   | 3.16717 | 1.61138 | 3.39394     | 5.05818     | 3.81201     |
| <b>5000</b>   | 2.61807 | 1.61745 | 3.05706     | 4.35654     | 2.70921     |

Table S33 Distances [in Å], between the heme iron and Cys435 sulfur, heme iron and ferryl oxygen, Cys435 sulfur and the backbone nitrogen atoms of Val436, Gly437 and Glu438 in the QM/MM optimized snapshots from the **2C9\_dist** simulation.

| Snapshot [ps] | d(Fe-S) | d(Fe-O) | d(S-Val436) | d(S-Gly437) | d(S-Glu438) |
|---------------|---------|---------|-------------|-------------|-------------|
| <b>0</b>      | 2.54704 | 1.62578 | 3.28194     | 2.46948     | 3.31352     |
| <b>200</b>    | 2.5754  | 1.6225  | 3.37709     | 2.46482     | 3.55044     |
| <b>400</b>    | 2.54798 | 1.62429 | 3.28189     | 2.38342     | 3.60804     |
| <b>600</b>    | 2.58604 | 1.62092 | 3.34743     | 2.35855     | 3.54075     |
| <b>800</b>    | 2.60737 | 1.6227  | 3.66642     | 2.47128     | 3.49943     |
| <b>1000</b>   | 2.59792 | 1.62413 | 3.55487     | 2.64526     | 3.22014     |
| <b>1200</b>   | 2.54801 | 1.62415 | 3.46724     | 2.57563     | 3.56532     |
| <b>1400</b>   | 2.58486 | 1.62629 | 3.26315     | 2.59252     | 4.01358     |
| <b>1600</b>   | 2.63922 | 1.61878 | 3.29235     | 2.30364     | 3.58111     |
| <b>1800</b>   | 2.5341  | 1.62586 | 3.46633     | 2.36391     | 3.50752     |
| <b>2000</b>   | 2.62083 | 1.61856 | 3.62647     | 2.39087     | 3.32125     |
| <b>2200</b>   | 2.55915 | 1.6225  | 3.59881     | 2.37629     | 3.34787     |
| <b>2400</b>   | 2.58817 | 1.62216 | 3.62891     | 2.42589     | 3.49093     |
| <b>2600</b>   | 2.66695 | 1.61678 | 3.56385     | 2.34441     | 3.54289     |
| <b>2800</b>   | 2.59812 | 1.62011 | 3.4211      | 2.43245     | 3.54969     |
| <b>3000</b>   | 2.68672 | 1.6201  | 3.43584     | 2.43704     | 3.62966     |
| <b>3200</b>   | 2.60881 | 1.62019 | 3.4326      | 2.42766     | 3.46375     |
| <b>3400</b>   | 2.66863 | 1.61916 | 3.33684     | 2.32112     | 3.5617      |
| <b>3600</b>   | 2.64655 | 1.61976 | 3.29241     | 2.42765     | 3.64094     |
| <b>3800</b>   | 2.58898 | 1.62126 | 3.38915     | 2.75468     | 3.67338     |
| <b>4000</b>   | 2.66061 | 1.6161  | 3.15577     | 2.52828     | 3.76819     |
| <b>4200</b>   | 2.58992 | 1.62133 | 3.09151     | 2.5355      | 3.71231     |
| <b>4400</b>   | 2.58726 | 1.62396 | 3.47272     | 2.49044     | 3.87887     |
| <b>4600</b>   | 2.58725 | 1.61968 | 3.55538     | 2.47028     | 3.52296     |
| <b>4800</b>   | 2.57945 | 1.62588 | 2.91674     | 2.37823     | 3.63516     |
| <b>5000</b>   | 2.6558  | 1.61792 | 3.08313     | 2.31247     | 3.97602     |

Table S34 Distances [in Å], between the heme iron and Cys435 sulfur, heme iron and ferryl oxygen, Cys435 sulfur and the backbone nitrogen atoms of Val436, Gly437 and Glu438 in the QM/MM optimized snapshots from the **2C9\_2warf** simulation.

| Snapshot [ps] | d(Fe-S) | d(Fe-O) | d(S-Val436) | d(S-Gly437) | d(S-Glu438) |
|---------------|---------|---------|-------------|-------------|-------------|
| <b>0</b>      | 2.59809 | 1.61896 | 3.27265     | 2.29955     | 3.40715     |
| <b>200</b>    | 2.61504 | 1.61892 | 3.23935     | 2.36327     | 3.44195     |
| <b>400</b>    | 2.5959  | 1.62102 | 3.25932     | 2.38322     | 3.42764     |
| <b>600</b>    | 2.58384 | 1.61973 | 3.41683     | 2.37598     | 3.24985     |
| <b>800</b>    | 2.63182 | 1.6178  | 3.32325     | 2.25759     | 3.87655     |
| <b>1000</b>   | 2.61399 | 1.61821 | 3.08668     | 2.27252     | 3.61312     |
| <b>1200</b>   | 2.64939 | 1.61729 | 3.02154     | 2.221       | 3.50065     |
| <b>1400</b>   | 2.60604 | 1.61802 | 3.21679     | 2.26604     | 3.35655     |
| <b>1600</b>   | 2.59898 | 1.62036 | 3.13973     | 2.37981     | 3.75301     |
| <b>1800</b>   | 2.5825  | 1.62023 | 3.27        | 2.25119     | 3.77244     |
| <b>2000</b>   | 2.61649 | 1.62006 | 2.9285      | 2.34805     | 3.51487     |
| <b>2200</b>   | 2.59536 | 1.61964 | 2.83598     | 2.20873     | 3.52809     |
| <b>2400</b>   | 2.60891 | 1.62216 | 3.00176     | 2.25666     | 4.13609     |
| <b>2600</b>   | 2.56283 | 1.62077 | 2.93198     | 2.26348     | 3.85535     |
| <b>2800</b>   | 2.63306 | 1.61722 | 3.18377     | 2.31568     | 3.50049     |
| <b>3000</b>   | 2.65155 | 1.61767 | 3.25307     | 2.34028     | 3.96453     |
| <b>3200</b>   | 2.56994 | 1.62198 | 2.70007     | 2.21185     | 3.58988     |
| <b>3400</b>   | 2.58769 | 1.6216  | 3.27673     | 2.3268      | 3.22176     |
| <b>3600</b>   | 2.63713 | 1.62023 | 3.25052     | 2.43599     | 3.12734     |
| <b>3800</b>   | 2.64754 | 1.61902 | 3.27323     | 2.38919     | 3.47872     |
| <b>4000</b>   | 2.86436 | 1.61384 | 3.28125     | 2.31917     | 3.99774     |
| <b>4200</b>   | 2.60734 | 1.6206  | 3.01422     | 2.38007     | 3.30387     |
| <b>4400</b>   | 2.63608 | 1.62021 | 2.8973      | 2.33562     | 3.61224     |
| <b>4600</b>   | 2.58581 | 1.62169 | 3.06449     | 2.26743     | 3.6374      |
| <b>4800</b>   | 2.59165 | 1.61692 | 3.12778     | 2.42518     | 4.00107     |
| <b>5000</b>   | 2.55301 | 1.62465 | 3.26924     | 2.29367     | 3.42748     |

Table S35 Distances [in Å], between the heme iron and Cys435 sulfur, heme iron and ferryl oxygen, Cys435 sulfur and the backbone nitrogen atoms of Leu231, Gly232 and Glu233 in the QM/MM optimized snapshots from the **2D6\_apo** simulation.

| Snapshot [ps] | d(Fe–S) | d(Fe–O) | d(S–Leu231) | d(S–Gly232) | d(S–Glu233) |
|---------------|---------|---------|-------------|-------------|-------------|
| <b>0</b>      | 2.5517  | 1.62119 | 3.33462     | 2.41898     | 2.41898     |
| <b>200</b>    | 2.65183 | 1.61607 | 3.36153     | 2.46744     | 2.46744     |
| <b>400</b>    | 2.60261 | 1.6189  | 3.38863     | 2.43906     | 2.43906     |
| <b>600</b>    | 2.62462 | 1.61735 | 3.16814     | 2.51229     | 2.51229     |
| <b>800</b>    | 2.60793 | 1.62079 | 3.24407     | 2.65953     | 2.65953     |
| <b>1000</b>   | 2.59699 | 1.62152 | 3.5083      | 2.56662     | 2.56662     |
| <b>1200</b>   | 2.60634 | 1.62007 | 3.2825      | 2.3986      | 2.3986      |
| <b>1400</b>   | 2.59684 | 1.61971 | 3.20034     | 2.60621     | 2.60621     |
| <b>1600</b>   | 2.68605 | 1.61534 | 3.65205     | 2.46294     | 2.46294     |
| <b>1800</b>   | 2.70494 | 1.61464 | 3.49221     | 2.31274     | 2.31274     |
| <b>2000</b>   | 2.69456 | 1.61738 | 3.49415     | 2.36745     | 2.36745     |
| <b>2200</b>   | 2.6628  | 1.61727 | 3.611       | 2.38071     | 2.38071     |
| <b>2400</b>   | 2.64427 | 1.6166  | 3.75287     | 2.37353     | 2.37353     |
| <b>2600</b>   | 2.65165 | 1.61737 | 3.57289     | 2.34524     | 2.34524     |
| <b>2800</b>   | 2.65012 | 1.61789 | 3.61253     | 2.35651     | 2.35651     |
| <b>3000</b>   | 2.74895 | 1.61886 | 3.82427     | 2.41707     | 2.41707     |
| <b>3200</b>   | 2.64015 | 1.61964 | 3.27829     | 2.30305     | 2.30305     |
| <b>3400</b>   | 2.70028 | 1.62738 | 3.01739     | 2.44369     | 2.44369     |
| <b>3600</b>   | 2.69057 | 1.62684 | 3.10586     | 2.60952     | 2.60952     |
| <b>3800</b>   | 2.69636 | 1.62672 | 2.97109     | 2.2928      | 2.2928      |
| <b>4000</b>   | 2.68771 | 1.62267 | 3.20189     | 2.3023      | 2.3023      |
| <b>4200</b>   | 2.691   | 1.62383 | 3.31937     | 2.32626     | 2.32626     |
| <b>4400</b>   | 2.78258 | 1.61884 | 3.19099     | 2.28815     | 2.28815     |
| <b>4600</b>   | 2.75616 | 1.62298 | 3.50578     | 2.41385     | 2.41385     |
| <b>4800</b>   | 2.63758 | 1.61962 | 3.45819     | 2.38868     | 2.38868     |
| <b>5000</b>   | 2.63356 | 1.62232 | 3.43312     | 2.32808     | 2.32808     |

Table S36 Distances [in Å], between the heme iron and Cys435 sulfur, heme iron and ferryl oxygen, Cys435 sulfur and the backbone nitrogen atoms of Val436, Gly437 and Glu438 in the QM/MM optimized snapshots from the **2D6\_dex** simulation.

| Snapshot [ps] | d(Fe-S) | d(Fe-O) | d(S-Val436) | d(S-Gly437) | d(S-Glu438) |
|---------------|---------|---------|-------------|-------------|-------------|
| <b>0</b>      | 2.56172 | 1.62691 | 3.12794     | 2.36478     | 3.98708     |
| <b>200</b>    | 2.54171 | 1.62561 | 3.24152     | 2.47921     | 3.61618     |
| <b>400</b>    | 2.55798 | 1.62362 | 3.21544     | 2.30421     | 3.15807     |
| <b>600</b>    | 2.5977  | 1.62207 | 3.27797     | 2.38437     | 3.30023     |
| <b>800</b>    | 2.58144 | 1.62198 | 3.24545     | 2.32542     | 3.3352      |
| <b>1000</b>   | 2.61286 | 1.62125 | 3.3767      | 2.40861     | 3.28494     |
| <b>1200</b>   | 2.63366 | 1.61857 | 3.86877     | 2.44147     | 3.23768     |
| <b>1400</b>   | 2.59547 | 1.62066 | 3.33286     | 2.22766     | 3.47152     |
| <b>1600</b>   | 2.57124 | 1.62194 | 3.53327     | 2.4034      | 3.26208     |
| <b>1800</b>   | 2.56412 | 1.62312 | 3.48287     | 2.32821     | 3.47447     |
| <b>2000</b>   | 2.60515 | 1.6207  | 3.48651     | 2.34127     | 3.21922     |
| <b>2200</b>   | 2.55706 | 1.62345 | 3.44664     | 2.25261     | 2.94158     |
| <b>2400</b>   | 2.61521 | 1.62002 | 3.41586     | 2.41835     | 3.43735     |
| <b>2600</b>   | 2.60118 | 1.61976 | 3.40756     | 2.31109     | 3.40795     |
| <b>2800</b>   | 2.57544 | 1.62089 | 3.6776      | 2.33757     | 3.08154     |
| <b>3000</b>   | 2.65011 | 1.61972 | 3.74154     | 2.28264     | 3.2786      |
| <b>3200</b>   | 2.63713 | 1.61879 | 3.56        | 2.32201     | 3.05852     |
| <b>3400</b>   | 2.60784 | 1.62049 | 3.62416     | 2.36953     | 3.1993      |
| <b>3600</b>   | 2.59789 | 1.62173 | 3.98175     | 2.58766     | 3.09273     |
| <b>3800</b>   | 2.60979 | 1.62285 | 3.54975     | 2.41454     | 3.83071     |
| <b>4000</b>   | 2.55376 | 1.62471 | 3.46486     | 2.27264     | 3.22146     |
| <b>4200</b>   | 2.65457 | 1.62109 | 2.99175     | 2.26352     | 4.34017     |
| <b>4400</b>   | 2.54583 | 1.62564 | 3.31587     | 2.18211     | 3.88177     |
| <b>4600</b>   | 2.60275 | 1.62163 | 3.64398     | 2.35901     | 3.45967     |
| <b>4800</b>   | 2.62027 | 1.6221  | 3.41091     | 2.34232     | 3.35471     |
| <b>5000</b>   | 2.55858 | 1.62355 | 3.5737      | 2.33696     | 3.05052     |

Table S37 Distances [in Å], between the heme iron and Cys435 sulfur, heme iron and ferryl oxygen, Cys435 sulfur and the backbone nitrogen atoms of Ile443, Gly444 and Met445 in the QM/MM optimized snapshots from the **3A4\_apo** simulation.

| Snapshot [ps] | d(Fe-S) | d(Fe-O) | d(S-Ile443) | d(S-Gly444) | d(S-Met445) |
|---------------|---------|---------|-------------|-------------|-------------|
| 0             | 2.54948 | 1.62425 | 3.57787     | 2.47925     | 3.57892     |
| 200           | 2.65542 | 1.61959 | 3.71568     | 2.75166     | 3.36163     |
| 400           | 2.52809 | 1.62339 | 3.62655     | 2.47182     | 3.38699     |
| 600           | 2.6104  | 1.62169 | 3.45592     | 2.49764     | 3.50858     |
| 800           | 2.60937 | 1.62062 | 3.4085      | 2.38463     | 3.49413     |
| 1000          | 2.59176 | 1.62263 | 3.39424     | 2.52522     | 3.79959     |
| 1200          | 2.66236 | 1.62146 | 3.55362     | 2.51125     | 3.4857      |
| 1400          | 2.59033 | 1.61792 | 3.3245      | 2.45426     | 3.7097      |
| 1600          | 2.56327 | 1.62326 | 3.18677     | 2.42727     | 3.48701     |
| 1800          | 2.62387 | 1.62405 | 3.18684     | 2.41638     | 3.95541     |
| 2000          | 2.61608 | 1.622   | 3.28161     | 2.32087     | 3.61306     |
| 2200          | 2.57867 | 1.62082 | 3.32718     | 2.36258     | 3.55952     |
| 2400          | 2.62378 | 1.62151 | 3.64123     | 2.46826     | 3.58075     |
| 2600          | 2.57554 | 1.62417 | 3.37042     | 2.37146     | 3.74436     |
| 2800          | 2.6368  | 1.6282  | 3.56697     | 2.49823     | 3.48246     |
| 3000          | 2.60135 | 1.62042 | 3.43016     | 2.46732     | 3.53767     |
| 3200          | 2.59016 | 1.62085 | 3.44674     | 2.43555     | 3.46625     |
| 3400          | 2.59821 | 1.62015 | 3.2628      | 2.44198     | 3.75605     |
| 3600          | 2.6877  | 1.61893 | 2.96565     | 3.217       | 4.0255      |
| 3800          | 2.59411 | 1.62082 | 3.38041     | 2.45898     | 3.39734     |
| 4000          | 2.58755 | 1.61847 | 3.17663     | 2.34012     | 3.44116     |
| 4200          | 2.54853 | 1.62062 | 3.27672     | 2.33742     | 3.43549     |
| 4400          | 2.60142 | 1.62428 | 3.27643     | 2.42086     | 3.43139     |
| 4600          | 2.57599 | 1.62532 | 3.33483     | 2.34263     | 3.64294     |
| 4800          | 2.5641  | 1.62258 | 3.24631     | 2.38233     | 3.6952      |
| 5000          | 2.55198 | 1.62378 | 2.80286     | 2.87831     | 3.93779     |

Table S38 Distances [in Å], between the heme iron and Cys435 sulfur, heme iron and ferryl oxygen, Cys435 sulfur and the backbone nitrogen atoms of Ile443, Gly444 and Met445 in the QM/MM optimized snapshots from the **3A4\_dex** simulation.

| Snapshot [ps] | d(Fe-S) | d(Fe-O) | d(S-Ile443) | d(S-Gly444) | d(S-Met445) |
|---------------|---------|---------|-------------|-------------|-------------|
| <b>0</b>      | 2.57156 | 1.62312 | 3.50036     | 2.55537     | 3.47199     |
| <b>200</b>    | 2.60573 | 1.62026 | 3.41812     | 2.5851      | 3.42451     |
| <b>400</b>    | 2.64463 | 1.61837 | 3.4289      | 2.34525     | 3.21903     |
| <b>600</b>    | 2.60038 | 1.62051 | 3.57741     | 2.66213     | 3.49044     |
| <b>800</b>    | 2.60053 | 1.61903 | 3.58565     | 2.46803     | 3.17569     |
| <b>1000</b>   | 2.65973 | 1.61935 | 3.58472     | 2.72298     | 3.7921      |
| <b>1200</b>   | 2.63405 | 1.6191  | 3.1274      | 2.43298     | 3.8081      |
| <b>1400</b>   | 2.60111 | 1.6191  | 3.47612     | 2.41952     | 3.13885     |
| <b>1600</b>   | 2.57066 | 1.62091 | 3.59078     | 2.48356     | 3.20564     |
| <b>1800</b>   | 2.61311 | 1.62139 | 3.33409     | 2.42019     | 3.13834     |
| <b>2000</b>   | 2.63327 | 1.61907 | 3.82036     | 2.58403     | 3.13351     |
| <b>2200</b>   | 2.56301 | 1.62504 | 3.1611      | 2.48063     | 3.33685     |
| <b>2400</b>   | 2.54517 | 1.62893 | 3.09647     | 2.34776     | 3.2793      |
| <b>2600</b>   | 2.56666 | 1.62336 | 3.48055     | 2.60381     | 3.09331     |
| <b>2800</b>   | 2.53479 | 1.6258  | 3.2146      | 2.43801     | 3.19202     |
| <b>3000</b>   | 2.59263 | 1.62108 | 3.32546     | 2.45919     | 3.10902     |
| <b>3200</b>   | 2.53714 | 1.62901 | 3.2448      | 2.42473     | 3.27916     |
| <b>3400</b>   | 2.58162 | 1.62487 | 3.30375     | 2.41087     | 3.11531     |
| <b>3600</b>   | 2.56629 | 1.62761 | 3.24922     | 2.47287     | 3.00457     |
| <b>3800</b>   | 2.54878 | 1.62445 | 3.036       | 2.27485     | 3.25651     |
| <b>4000</b>   | 2.57435 | 1.62668 | 3.10801     | 2.46336     | 3.26362     |
| <b>4200</b>   | 2.55148 | 1.62777 | 3.33863     | 2.54678     | 3.40789     |
| <b>4400</b>   | 2.58106 | 1.62339 | 3.20649     | 2.56911     | 3.42629     |
| <b>4600</b>   | 2.56825 | 1.6246  | 3.49163     | 2.48929     | 3.21795     |
| <b>4800</b>   | 2.54254 | 1.63152 | 3.4238      | 2.46579     | 3.34019     |
| <b>5000</b>   | 2.5741  | 1.62824 | 2.96693     | 2.32234     | 3.2092      |

Table S39 Distances [in Å], between the heme iron and Cys435 sulfur, heme iron and ferryl oxygen, Cys435 sulfur and the backbone nitrogen atoms of Leu358, Gly359 and Gln360 in the QM/MM optimized snapshots from the **P450<sub>cam</sub>** apo simulation.

| Snapshot [ps] | d(Fe-S) | d(Fe-O) | d(S-Leu358) | d(S-Gly359) | d(S-Glu360) |
|---------------|---------|---------|-------------|-------------|-------------|
| <b>0</b>      | 2.58441 | 1.62225 | 3.3539      | 2.49144     | 3.20664     |
| <b>200</b>    | 2.57702 | 1.62086 | 3.59579     | 2.46691     | 3.07238     |
| <b>400</b>    | 2.54508 | 1.62452 | 3.09282     | 2.18901     | 3.25571     |
| <b>600</b>    | 2.57258 | 1.62334 | 3.33024     | 2.29819     | 2.77933     |
| <b>800</b>    | 2.60923 | 1.61684 | 3.33265     | 2.32239     | 3.93951     |
| <b>1000</b>   | 2.66457 | 1.61755 | 3.13482     | 2.26707     | 4.21688     |
| <b>1200</b>   | 2.61835 | 1.62333 | 3.10566     | 2.22525     | 3.33671     |
| <b>1400</b>   | 2.65534 | 1.61895 | 3.06539     | 2.17597     | 3.89262     |
| <b>1600</b>   | 2.60171 | 1.62022 | 3.24797     | 2.22675     | 3.25898     |
| <b>1800</b>   | 2.59521 | 1.61717 | 3.48437     | 2.32446     | 3.56742     |
| <b>2000</b>   | 2.56429 | 1.62247 | 3.18492     | 2.19521     | 3.27362     |
| <b>2200</b>   | 2.59203 | 1.62094 | 3.32706     | 2.23016     | 3.52423     |
| <b>2400</b>   | 2.62197 | 1.61906 | 3.10512     | 2.19662     | 3.6625      |
| <b>2600</b>   | 2.58987 | 1.62088 | 3.35666     | 2.21635     | 3.45889     |
| <b>2800</b>   | 2.69206 | 1.62223 | 3.33231     | 2.28583     | 3.93691     |
| <b>3000</b>   | 2.5894  | 1.62367 | 3.41707     | 2.18107     | 3.50681     |
| <b>3200</b>   | 2.61844 | 1.61874 | 3.20236     | 2.23647     | 3.2654      |
| <b>3400</b>   | 2.60134 | 1.62673 | 3.34336     | 2.23629     | 3.78851     |
| <b>3600</b>   | 2.62518 | 1.61979 | 3.07917     | 2.16815     | 3.58588     |
| <b>3800</b>   | 2.74567 | 1.61236 | 3.12861     | 2.15271     | 3.83288     |
| <b>4000</b>   | 2.65491 | 1.62613 | 3.4862      | 2.23243     | 3.51808     |
| <b>4200</b>   | 2.79157 | 1.61688 | 3.39661     | 2.30285     | 3.78807     |
| <b>4400</b>   | 2.67098 | 1.61937 | 3.44906     | 2.24855     | 3.65051     |
| <b>4600</b>   | 2.64935 | 1.618   | 3.3385      | 2.24726     | 3.77022     |
| <b>4800</b>   | 2.65589 | 1.6176  | 3.00056     | 2.17869     | 3.53183     |
| <b>5000</b>   | 2.56399 | 1.62029 | 3.33678     | 2.22803     | 3.94871     |



Table S40 Distances [in Å], between the heme iron and Cys435 sulfur, heme iron and ferryl oxygen, Cys435 sulfur and the backbone nitrogen atoms of Leu358, Gly359 and Glu360 in the QM/MM optimized snapshots from the **P450<sub>cam</sub>** prop simulation.

| Snapshot [ps] | d(Fe-S) | d(Fe-O) | d(S-Leu358) | d(S-Gly359) | d(S-Glu360) |
|---------------|---------|---------|-------------|-------------|-------------|
| <b>0</b>      | 2.59327 | 1.62497 | 3.43013     | 2.4338      | 2.80913     |
| <b>200</b>    | 2.57574 | 1.62632 | 3.33553     | 2.36145     | 2.91568     |
| <b>400</b>    | 2.55939 | 1.62583 | 3.13577     | 2.37845     | 2.66767     |
| <b>600</b>    | 2.59933 | 1.6257  | 3.37723     | 2.47677     | 3.12338     |
| <b>800</b>    | 2.55454 | 1.62593 | 3.12432     | 2.34927     | 3.12344     |
| <b>1000</b>   | 2.61251 | 1.6238  | 2.99158     | 2.32562     | 3.2824      |
| <b>1200</b>   | 2.58295 | 1.62558 | 3.0789      | 2.35892     | 3.30834     |
| <b>1400</b>   | 2.55243 | 1.62751 | 3.27636     | 2.37267     | 2.82634     |
| <b>1600</b>   | 2.60402 | 1.62626 | 3.12073     | 2.27852     | 2.82024     |
| <b>1800</b>   | 2.60962 | 1.62434 | 3.08298     | 2.26633     | 2.62332     |
| <b>2000</b>   | 2.62775 | 1.62003 | 3.4914      | 2.46214     | 3.80849     |
| <b>2200</b>   | 2.59403 | 1.6266  | 3.36034     | 2.26581     | 3.65158     |
| <b>2400</b>   | 2.57118 | 1.62483 | 3.52656     | 2.48967     | 3.63594     |
| <b>2600</b>   | 2.60358 | 1.61762 | 3.36898     | 2.31313     | 3.83907     |
| <b>2800</b>   | 2.58086 | 1.62637 | 3.31236     | 3.92331     | 2.50206     |
| <b>3000</b>   | 2.58966 | 1.62366 | 2.97097     | 4.38875     | 2.82808     |
| <b>3200</b>   | 2.57741 | 1.62882 | 3.26317     | 4.05405     | 2.60739     |
| <b>3400</b>   | 2.60879 | 1.62592 | 3.2397      | 3.96641     | 2.48779     |
| <b>3600</b>   | 2.63197 | 1.62237 | 3.46319     | 3.55102     | 2.4783      |
| <b>3800</b>   | 2.60967 | 1.62526 | 3.25683     | 4.36917     | 2.7542      |
| <b>4000</b>   | 2.62745 | 1.62506 | 3.22151     | 3.97257     | 2.53851     |
| <b>4200</b>   | 2.70086 | 1.61948 | 3.72022     | 5.13102     | 2.88738     |
| <b>4400</b>   | 2.61125 | 1.62378 | 3.17462     | 4.35443     | 2.86593     |
| <b>4600</b>   | 2.60599 | 1.62635 | 3.36837     | 4.00431     | 2.7249      |
| <b>4800</b>   | 2.58707 | 1.62549 | 3.11928     | 4.42946     | 2.91666     |
| <b>5000</b>   | 2.5893  | 1.62606 | 3.18237     | 4.00909     | 2.62153     |

## References

- (1) Brooks, B. R.; Bruccoleri, R. E.; Olafson, B. D.; States, D. J.; Swaminathan, S.; Karplus, M. *J. Comput. Chem.* **1983**, *4*, 187.
- (2) MacKerell, A. D.; Bashford, D.; Bellott, M.; Dunbrack, R. L.; Evanseck, J. D.; Field, M. J.; Fischer, S.; Gao, J.; Guo, H.; Ha, S.; Joseph-McCarthy, D.; Kuchnir, L.; Kuczera, K.; Lau, F. T. K.; Mattos, C.; Michnick, S.; Ngo, T.; Nguyen, D. T.; Prodhom, B.; Reiher, W. E.; Roux, B.; Schlenkrich, M.; Smith, J. C.; Stote, R.; Straub, J.; Watanabe, M.; Wiorkiewicz-Kuczera, J.; Yin, D.; Karplus, M. *J. Phys. Chem. B* **1998**, *102*, 3586.
- (3) Zurek, J.; Foloppe, N.; Harvey, J. N.; Mulholland, A. J. *Org. Biomol. Chem.* **2006**, *4*, 3931.
- (4) Oláh, J.; Mulholland, A. J.; Harvey, J. N. *Proc. Natl. Acad. Sci. USA* **2011**, *Advance Article*, doi:10.1073/pnas.1010194108.
- (5) Bathelt, C. M.; Zurek, J.; Mulholland, A. J.; Harvey, J. N. *J. Am. Chem. Soc.* **2005**, *127*, 12900.
- (6) Jorgensen, W. L.; Chandrasekhar, J.; Madura, J. D.; Impey, R. W.; Klein, M. L. *J. Chem. Phys.* **1983**, *79*, 926.
- (7) Ryckaert, J.-P.; Ciccotti, G.; Berendsen, H. J. C. *J. Comput. Phys.* **1977**, *23*, 327.
